# Supplementary material for: Imaging nodal knots in momentum space through topolectrical circuits
Source: PubMed Central journal article supplement (PMC7463261; doi:10.1038/s41467-020-17716-1), 2020-09-01
Supplement: 41467_2020_17716_MOESM1_ESM.pdf [file 41467_2020_17716_MOESM1_ESM.pdf]

# Supplementary Information

**Imaging nodal knots in momentum space through topoelectrical circuits**

By Lee *et. al.*

## I. SUPPLEMENTARY INFORMATION

### Supplementary Note 1: Relation between drumhead states and surface topological band structure

Here we briefly illustrate how topological drumhead regions can be read from the surface band structure. Consider for instance a trefoil nodal knot, as shown in the left panels of Fig. 1. Drumhead regions are points in the surface Brillouin zone where topological zero modes exist. As evident in the surface band structures (Right panels) plotted along the dashed paths on the left, these zero modes must necessarily terminate at bulk gap closures, i.e. nodal lines. As such, drumhead states are necessarily demarcated by the surface nodal lines.

### Supplementary Note 2: Alexander polynomial from the braid

The Alexander polynomial invariant of a knot can in fact be directly computed from its braid closure. At first sight, this seems tricky, because the closure of a series of braid operations do not uniquely define a knot/link, which can easily be topologically equivalent to a seemingly different braid. That said, there exists a direct means of obtaining the Alexander polynomial  $A(t)$  via the (unreduced) Burau representation of a braid:

$$\sigma_i \rightarrow \sigma_i(t) = \mathbb{I}_{i-1} \oplus \begin{pmatrix} 1-t & t \\ 1 & 0 \end{pmatrix} \oplus \mathbb{I}_{N-i-1}, \quad (1)$$

where  $N$  is the total number of strands. A generic braid can be expressed as a composition of braid operations  $\sigma_{i_1}^{\pm} \sigma_{i_2}^{\pm} \sigma_{i_3}^{\pm} \dots$ , with corresponding Burau representation matrix  $\sigma(t) = \sigma_{i_1}^{\pm}(t) \sigma_{i_2}^{\pm}(t) \sigma_{i_3}^{\pm}(t) \dots$ . It turns out that the Alexander polynomial invariant is simply given by

$$A(t) = \det([\mathbb{I}_N - \sigma]_{11}(t)), \quad (2)$$

where  $[\mathbb{I}_N - \sigma]_{11}(t)$  is the minor matrix of  $\mathbb{I}_N - \sigma(t)$ , which is obtained by omitting its first row and column. Note that when  $t = 1$ ,  $\sigma(1)$  just gives the permutation matrix for the entire braid, and that each independent permutation cycle gives rise to a separate line node. It is also conventional to normalize  $A(t)$  by a power of  $t$ , such that it becomes symmetric in  $t$  and  $t^{-1}$ .

### Supplementary Note 3: Further details of circuit simulation and implementation

Large-scale *Xyce* simulations provide a platform towards a realistic experimental setting of our circuit design. The compatibility of simulation and experiment for electrical circuits reaches an unprecedented degree of accuracy and agreement in comparison to any other architecture in which topological bands can unfold. A rigorous simulation includes the use of realistic voltage sources supplemented by corresponding shunt resistances, serving as the external excitation, i.e., inhomogeneities to the circuit's differential equations. The simulation further incorporates a realistic measurement process comprising a read-out of voltages at the circuit nodes and of the input current through the shunt resistance, which is analogous to an experimental framework. There, Lock-In amplifiers can be used for the corresponding measurements at fixed frequency. Similar to the experimental sequence of data analysis, the simulation data is subsequently post-processed to reconstruct the admittance band structure from global single-point voltage measurements. In principle, circuit simulations also allow to incorporate component tolerances and serial resistances to study disorder and parasitic effects.

### Supplementary Note 4: Explicit forms of Nodal Knots

We next present the explicit forms of the nodal knots used in the above simulations. These may be appropriately truncated for experimental implementations, as is done for the Hopf-link experiment described later. The coefficients in the defining functions  $z(\mathbf{k})$  and  $w(\mathbf{k})$ , which determine the precise nodal line can be modified as long as the winding number, which defines the mapping to the three dimensional Brillouin zone stays invariant. This implies, that small changes of the coefficients will only modify the shape and not the principal structure of the knot. Concerning the simulations of the knot structures, we fine-tuned those coefficients to an optimal value, that mediates between the complexity of *Xyce* simulations and the resolution of the knot in the three-dimensional momentum grid determined by the implemented system sizes.

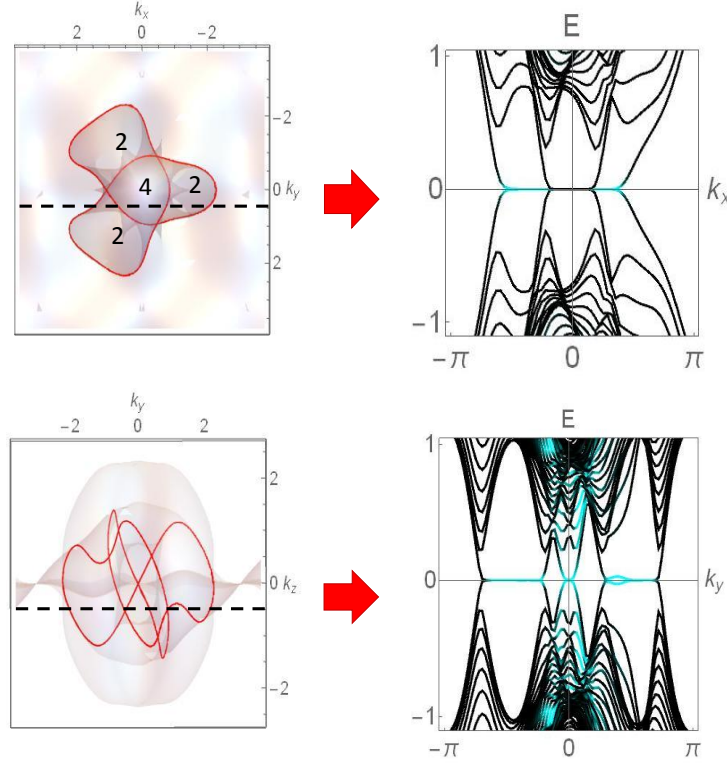

**Supplementary Figure 1:** Surface Trefoil knot nodal structure and drumhead states labeled by their multiplicities (Left panels), with corresponding surface band structures along the indicated dashed lines shown on the right. Blue/black curves indicated surface/bulk localization. The top and bottom panels illustrate the same system viewed from different angles.

### 1. Hopf-link circuit

For the Hopf-link, we employ a knot function of the form

$$f(z, w) = z^2 - w^2 \quad (3)$$

with  $z(k_x, k_y, k_z)$  and  $w(k_x, k_y, k_z)$  as defined in equation 7 of the main text. The real and imaginary part of  $f(k_x, k_y, k_z)$ , truncated to admit only nearest-neighbor couplings in each direction with commensurate magnitudes, are given by

$$\begin{aligned} \Re f(k_x, k_y, k_z) = & -10 + 8 \cos(k_x) - 2 \cos(k_x - k_y) + 8 \cos(k_y) - 2 \cos(2k_y) - 2 \cos(k_x + k_y) - 2 \cos(k_x - k_z) \\ & - 2 \cos(k_y - k_z) + 8 \cos(k_z) + 2 \cos(4k_z) - 2 \cos(k_x + k_z) - 2 \cos(k_y + k_z) \end{aligned} \quad (4a)$$

$$\begin{aligned} \Im f(k_x, k_y, k_z) = & -2 + \cos(k_x) - \cos(k_x - k_y) + \cos(k_y) + \cos(k_x + k_y) + \cos(k_x - 2k_z) \\ & + \cos(k_y - 2k_z) + 2 \cos(k_z) - 4 \cos(2k_z) + \cos(3k_z) + \cos(k_x + 2k_z) + \cos(k_y + 2k_z). \end{aligned} \quad (4b)$$

The corresponding circuit Laplacian is given by  $J(k_x, k_y, k_z) = i\omega C[\Im f(k_x, k_y, k_z)\tau_x + \Re f(k_x, k_y, k_z)\tau_z]$ , whose form in real space is illustrated in in Fig. 3, with  $LC$  normalized to unity.

### 2. Trefoil knot circuit

For the Trefoil knot, we employ a knot function of the form

$$f(z, w) = z^3 - w^2 \quad (5)$$

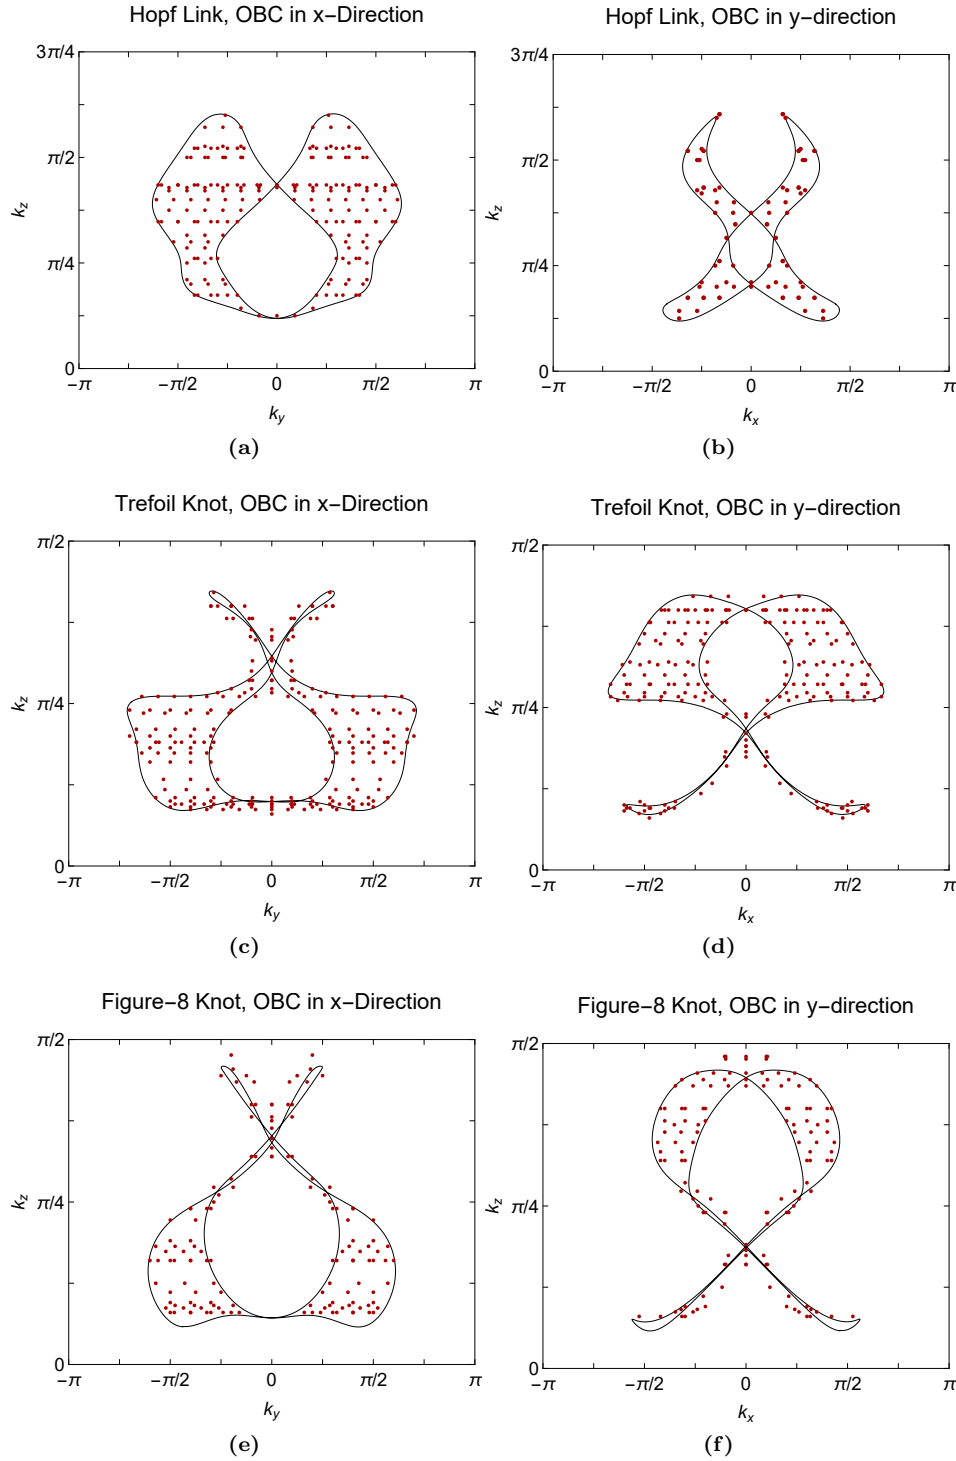

**Supplementary Figure 2:** Simulations of circuits implementing different nodal knot structures with OBCs in  $x$ - or  $y$ -direction as indicated. Red dots correspond to admittance eigenvalues, whose absolute value is smaller than an upper threshold of  $j_x$  or  $j_y$  for OBCs in  $x$ - or  $y$ -direction respectively. Black lines indicate the theoretical nodal knot projected onto the surface Brillouin zone. Hopf-links in (a) and (b) includes simulations with system sizes of  $(22 \times 22 \times 16)$ ,  $(23 \times 23 \times 20)$ ,  $(16 \times 22 \times 19)$ ,  $(22 \times 22 \times 14)$ ,  $(25 \times 20 \times 23)$  and  $(25 \times 24 \times 23)$ , while  $j_x = 0.0027\Omega^{-1}$  and  $j_y = 0.0020\Omega^{-1}$ . Trefoil knots in (c) and (d) includes simulations with system sizes of  $(20 \times 20 \times 20)$ ,  $(21 \times 21 \times 21)$ ,  $(24 \times 15 \times 15)$ ,  $(21 \times 20 \times 25)$ ,  $(18 \times 19 \times 17)$ ,  $(17 \times 18 \times 21)$ ,  $(23 \times 21 \times 19)$ ,  $(19 \times 25 \times 23)$  and  $(20 \times 20 \times 22)$ , while  $j_x = 0.0030\Omega^{-1}$  and  $j_y = 0.0025\Omega^{-1}$ . Figure-8 knots in (e) and (f) includes simulations with system sizes of  $(23 \times 23 \times 23)$ ,  $(20 \times 20 \times 25)$ ,  $(20 \times 20 \times 21)$ ,  $(19 \times 16 \times 18)$ ,  $(17 \times 14 \times 16)$ ,  $(19 \times 25 \times 25)$  and  $(25 \times 21 \times 22)$ , while  $j_x = 0.0028\Omega^{-1}$  and  $j_y = 0.0032\Omega^{-1}$ .

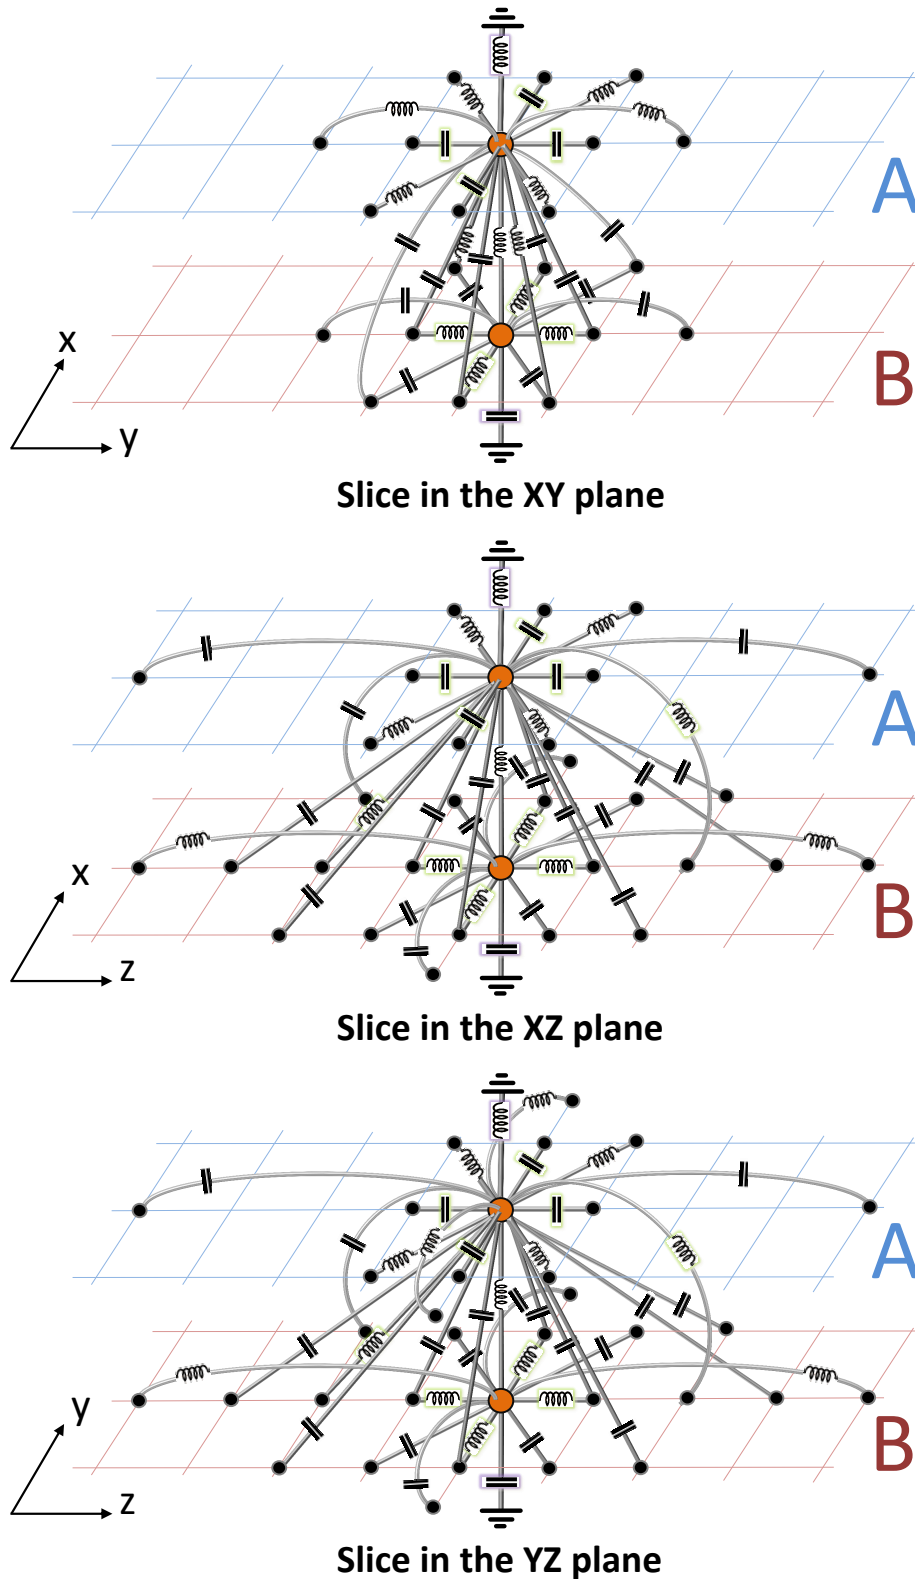

**Supplementary Figure 3:** Explicit illustration of the Hopf-link circuit in real-space. The circuit has an unit cell with sublattices *A* and *B*. For readability's sake, the 3D circuit network is expressed as slices in each of the 3 planes. For each slice, the connections are only shown emanating from one reference node (orange) from each sublattice. Also, for the inter-sublattice connections, only connections emanating from the reference node in *A*, and not *B*, are shown to avoid clutter. Each connection along *x*, *y* or *z* directions appear in two out of the three diagrams, while each connection in one of the planes appear only once. The black capacitors/inductors have magnitudes  $C$  and  $L$ , the purple glowing ones have magnitudes  $2C$  and  $\frac{L}{2}$ , and the green glowing ones have magnitudes  $4C$  and  $\frac{L}{4}$ .

with

$$z(k_x, k_y, k_z) = 1.15 \cos(2k_z) + 0.1 + i(\cos(k_x) + \cos(k_y) + 1.25 \cos(k_z) - 2.1), \quad (6a)$$

$$w(k_x, k_y, k_z) = \sin(k_x) + i \sin(k_y). \quad (6b)$$

The real and imaginary part of  $f(k_x, k_y, k_z)$  with additional truncations applied is then given by

$$\begin{aligned} \Re f(k_x, k_y, k_z) = & -3.00566 + 1.26 \cos(k_x) + 0.35 \cos(2k_x) - 0.3 \cos(k_x - k_y) + 1.26 \cos(k_y) \\ & - 0.65 \cos(2k_y) - 0.3 \cos(k_x + k_y) - 2.15625 \cos(k_x - 3k_z) - 2.15625 \cos(k_y - 3k_z) \\ & + 7.245 \cos(k_x - 2k_z) - 0.8625 \cos(2k_x - 2k_z) - 1.725 \cos(k_x - k_y - 2k_z) \\ & + 7.245 \cos(k_y - 2k_z) - 1.725 \cos(k_x + k_y - 2k_z) - 0.8625 \cos(2k_y - 2k_z) \\ & - 2.53125 \cos(k_x - k_z) - 2.53125 \cos(k_y - k_z) + 10.6312 \cos(k_z) - 20.419 \cos(2k_z) \\ & + 9.05625 \cos(3k_z) - 1.14928 \cos(4k_z) + 0.760438 \cos(6k_z) - 2.53125 \cos(k_x + k_z) \\ & - 2.53125 \cos(k_y + k_z) + 7.245 \cos(k_x + 2k_z) - 0.8625 \cos(2k_x + 2k_z) \\ & - 1.725 \cos(k_x - k_y + 2k_z) + 7.245 \cos(k_y + 2k_z) - 1.725 \cos(k_x + k_y + 2k_z) \\ & - 0.8625 \cos(2k_y + 2k_z) - 2.15625 \cos(k_x + 3k_z) - 2.15625 \cos(k_y + 3k_z) \end{aligned} \quad (7a)$$

$$\begin{aligned} \Im f(k_x, k_y, k_z) = & 16.254 - 15.81 \cos(k_x) + 3.15 \cos(2k_x) - 0.25 \cos(3k_x) - 0.75 \cos(k_x - 2k_y) + 5.3 \cos(k_x - k_y) \\ & - 0.75 \cos(2k_x - k_y) - 15.81 \cos(k_y) + 3.15 \cos(2k_y) - 0.25 \cos(3k_y) + 7.3 \cos(k_x + k_y) \\ & - 0.75 \cos(2k_x + k_y) - 0.75 \cos(k_x + 2k_y) + 0.991875 \cos(k_x - 4k_z) + 0.991875 \cos(k_y - 4k_z) \\ & - 0.826875 \cos(k_x - 2k_z) - 0.826875 \cos(k_y - 2k_z) + 7.875 \cos(k_x - k_z) - 0.9375 \cos(2k_x - k_z) \\ & - 1.875 \cos(k_x - k_y - k_z) + 7.875 \cos(k_y - k_z) - 1.875 \cos(k_x + k_y - k_z) - 0.9375 \cos(2k_y - k_z) \\ & - 18.8039 \cos(k_z) + 3.47288 \cos(2k_z) + 1.18281 \cos(3k_z) - 4.16588 \cos(4k_z) \\ & + 1.23984 \cos(5k_z) + 7.875 \cos(k_x + k_z) - 0.9375 \cos(2k_x + k_z) - 1.875 \cos(k_x - k_y + k_z) \\ & + 7.875 \cos(k_y + k_z) - 1.875 \cos(k_x + k_y + k_z) - 0.9375 \cos(2k_y + k_z) - 0.826875 \cos(k_x + 2k_z) \\ & - 0.826875 \cos(k_y + 2k_z) + 0.991875 \cos(k_x + 4k_z) + 0.991875 \cos(k_y + 4k_z). \end{aligned} \quad (7b)$$

While the trigonometrical coefficients above are obtained from an exact expansions of  $f(z, w)$ , most of them can be varied about 20 – 30% without changing the topology of the knot.

### 3. Figure-8 knot circuit

For the figure-8 knot, we employ a knot function of the form

$$\begin{aligned} f(z, w) = & 64 z^3 - 12 z (3 + 2(w^2 - \bar{w}^2)) \\ & - 14 (w^2 + \bar{w}^2) - (w^4 - \bar{w}^4) \end{aligned} \quad (8)$$

with

$$z(k_x, k_y, k_z) = \cos(2k_z) + 0.1 + i(\cos(k_x) + \cos(k_y) + \cos(k_z) - 2), \quad (9a)$$

$$w(k_x, k_y, k_z) = \sin(k_x) + i \sin(k_y). \quad (9b)$$

The real and imaginary part of  $f(k_x, k_y, k_z)$  with additional truncations applied is then given by

$$\begin{aligned}
\Re f(k_x, k_y, k_z) = & -147.536 + 76.8 \cos(k_x) + 4.4 \cos(2k_x) + 24 \cos(k_x - 2k_y) - 115.2 \cos(k_x - k_y) \\
& + 24 \cos(2k_x - k_y) + 76.8 \cos(k_y) - 23.6 \cos(2k_y) + 76.8 \cos(k_x + k_y) - 24 \cos(2k_x + k_y) \\
& - 24 \cos(k_x + 2k_y) - 96 \cos(k_x - 3k_z) - 96 \cos(k_y - 3k_z) + 384 \cos(k_x - 2k_z) - 48 \cos(2k_x - 2k_z) \\
& - 96 \cos(k_x - k_y - 2k_z) + 384 \cos(k_y - 2k_z) - 96 \cos(k_x + k_y - 2k_z) - 48 \cos(2k_y - 2k_z) \\
& - 115.2 \cos(k_x - k_z) + 24 \cos(k_x - k_y - k_z) - 115.2 \cos(k_y - k_z) - 24 \cos(k_x + k_y - k_z) \\
& + 460.8 \cos(k_z) - 1051.68 \cos(2k_z) + 384 \cos(3k_z) - 38.4 \cos(4k_z) + 16 \cos(6k_z) \\
& - 115.2 \cos(k_x + k_z) + 24 \cos(k_x - k_y + k_z) - 115.2 \cos(k_y + k_z) - 24 \cos(k_x + k_y + k_z) \\
& + 384 \cos(k_x + 2k_z) - 48 \cos(2k_x + 2k_z) - 96 \cos(k_x - k_y + 2k_z) + 384 \cos(k_y + 2k_z) \\
& - 96 \cos(k_x + k_y + 2k_z) - 48 \cos(2k_y + 2k_z) - 96 \cos(k_x + 3k_z) - 96 \cos(k_y + 3k_z)
\end{aligned} \tag{10a}$$

and

$$\begin{aligned}
\Im f(k_x, k_y, k_z) = & 964.16 - 946.08 \cos(k_x) + 192 \cos(2k_x) - 16 \cos(3k_x) - \cos(k_x - 3k_y) - 48 \cos(k_x - 2k_y) \\
& + 379.2 \cos(k_x - k_y) - 48 \cos(2k_x - k_y) + \cos(3k_x - k_y) - 946.08 \cos(k_y) + 192 \cos(2k_y) \\
& - 16 \cos(3k_y) + 388.8 \cos(k_x + k_y) - 48 \cos(2k_x + k_y) - \cos(3k_x + k_y) - 48 \cos(k_x + 2k_y) \\
& + \cos(k_x + 3k_y) + 48 \cos(k_x - 4k_z) + 48 \cos(k_y - 4k_z) - 28.8 \cos(k_x - 2k_z) \\
& - 24 \cos(k_x - k_y - 2k_z) - 28.8 \cos(k_y - 2k_z) + 24 \cos(k_x + k_y - 2k_z) + 384 \cos(k_x - k_z) \\
& - 48 \cos(2k_x - k_z) - 96 \cos(k_x - k_y - k_z) + 384 \cos(k_y - k_z) - 96 \cos(k_x + k_y - k_z) \\
& - 48 \cos(2k_y - k_z) - 926.88 \cos(k_z) + 115.2 \cos(2k_z) + 51.2 \cos(3k_z) - 192 \cos(4k_z) \\
& + 48 \cos(5k_z) + 384 \cos(k_x + k_z) - 48 \cos(2k_x + k_z) - 96 \cos(k_x - k_y + k_z) + 384 \cos(k_y + k_z) \\
& - 96 \cos(k_x + k_y + k_z) - 48 \cos(2k_y + k_z) - 28.8 \cos(k_x + 2k_z) - 24 \cos(k_x - k_y + 2k_z) \\
& - 28.8 \cos(k_y + 2k_z) + 24 \cos(k_x + k_y + 2k_z) + 48 \cos(k_x + 4k_z) + 48 \cos(k_y + 4k_z).
\end{aligned} \tag{10b}$$

## Supplementary Note 5: Future Experimental Enhancements

In this experiment, we have developed a practical framework for constructing tunable circuit arrays that are sufficiently precise for reliably reproducing desired topological band structure features. A central challenge has been the tuning of repeated elements like inductors, which has to be accurately synchronized across all the repeating unit cells. We emphasize that this tunability has rarely been accomplished in the context of circuits with topological band structures.

Moving forward, the most crucial enhancement will be the automation of this tuning with a micro-controller. This will supersede our manual mechanical tuning of the variable inductors, which takes at least a minute for each component. Supplementary Figure 4 describes a solid-state automated tunable circuit with a MOSFET transistor controlling the wire loop around a fixed value inductor. By varying the gate voltage of the MOSFET through a micro-controller, the resistance in the wire loop may be electronically controlled to precisely vary the induced current in the wire loop and hence the impedance/inductance of the coupling unit. Requiring no manual control input i.e. visual reference to an oscilloscope, this approach can achieve drastic speedup for the tuning, and perhaps even allow real-time tuning for the simulation of Floquet Hamiltonians. While additional circuitry is required to connect all inductors to a common impedance measurement circuit, presenting an optimization challenge in dense complicated circuit arrays, this too can be streamlined with intelligent design approaches.

Another important advance will be the realization of nodal knots as a bona-fide spatial 3D circuit arrays. Nodal knot circuits possess more complicated structures than existing realizations of other 3D topoelectrical circuits [1, 2], and will require more sophisticated PCB designs as well as a more extensive set of component i.e. capacitance values. To realize these capacitances as combinations of commercially available capacitors, it will be advantageous to use an artificial intelligence search-tree algorithm for finding the optimal combinations with fewest components or lowest cost. Related optimization algorithms can also be used to optimize the circuit array configuration in physical space, which is an important consideration when the circuit complexity increases [2, 3].

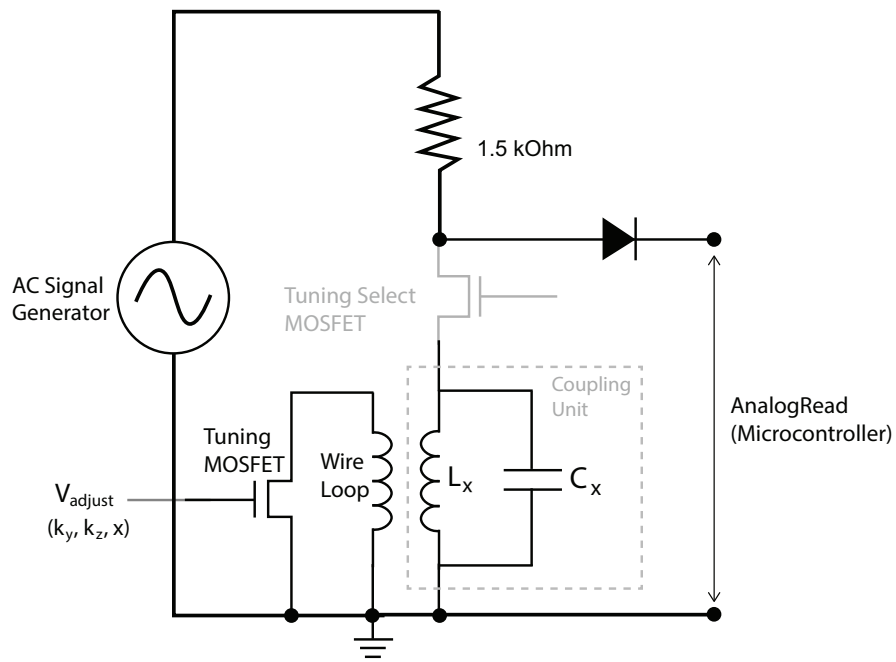

**Supplementary Figure 4:** Proposed circuit for automated tuning of variable inductors which make up the coupling units (logical components). The variable inductors consist of a wire loop surrounding fixed value inductors in series with a MOSFET transistor. The transistor controls the maximum current that may be induced in the wire loop, and therefore its effect on the magnetic field in the fixed value inductor and its resulting inductance. The micro-controller measures the amplitude of the AC potential across each coupling unit and adjusts the MOSFET voltage to achieve the desired impedance.



**Supplementary Table 1:** Capacitor values required in each logical component  $t, -t, v, t_{AB}, g_A, g_B$ . The exact required values from Eq. (27) in the Methods are slightly adapted to their target values possible with parallel combinations of standard commercially available capacitors. These parallel combinations should give a capacitance that agrees with its target capacitance values to at least 99.8%.

| Component | Exact (pF) | Target (pF) | Standard. Cap. Combi.(pF) | Exp. Value |
|-----------|------------|-------------|---------------------------|------------|
| t         | 1755       | 1655        | 56,220,560,820            | 1656       |
| v         | 1305       | 1205        | 56,330,820                | 1206       |
| -t        | 3270       | 2770        | 10,560,2200               | 2770       |
| tAB       | 3583       | 3083        | 10,56,820,2200            | 3086       |
| gA        | 3655       | 3155        | 33,100,820,2200           | 3153       |
| gB        | 4059       | 3559        | 33,220,3300               | 3553       |

**Supplementary Table 2:** List of physical components that make up the logical components in each unit cell, as labeled in the PCB diagram and photograph in Fig. 9. The fixed value inductor components have an uncertainty of +/-10% and a parasitic resistance of 0.10  $\Omega$ , while the fixed value capacitor components have an uncertainty of +/-5%.

| Component                    | Value | Units         | Manufacturer     | Part Number        |
|------------------------------|-------|---------------|------------------|--------------------|
| Lt, Lv                       | 39    | $\mu\text{H}$ | Bourns JW Miller | RL622-390K-RC      |
| Lmt, LtAB, LgA, LgB          | 10    | $\mu\text{H}$ | Bourns JW Miller | RL622-100K-RC      |
| Ct0, Cv10, Cv20, CtAB1       | 56    | pF            | MULTICOMP PRO    | MC0603N560J500CT   |
| Ct1, CgB1                    | 220   | pF            | WALSIN           | 0402N221J500CT     |
| Ct2, Cmt1                    | 560   | pF            | YAGEO            | CC0805JRNPO9BN561  |
| Ct3, Cv12, Cv22, CtAB2, CgA2 | 820   | pF            | WALSIN           | 0603N821J500CT     |
| Cv11, Cv21                   | 330   | pF            | WALSIN           | 0805N331J500CT     |
| Cmt0, CtAB0                  | 10    | pF            | MULTICOMP PRO    | MC0603N100J500CT   |
| Cmt2, CtAB3, CgA3            | 2200  | pF            | KEMET            | C0402C222J5RACTU   |
| CgA0, CgB0                   | 33    | pF            | MULTICOMP PRO    | MC0402N330J500CT   |
| CgA1                         | 100   | pF            | MURATA           | GRM0335C1E101JA01D |
| CgB1                         | 3300  | pF            | AVX              | 04025C332JAT2A     |

**Supplementary Table 3:** Impedance data at various sampling points  $(k_y, k_z)$  simulated at the theoretically determined AC frequency  $f_0 = 795$  kHz, and measured at both  $f_0 = 795$  kHz and the calibration-corrected frequency  $f_{\text{exp.}} = 740$  kHz.  $Z_i(\text{sim}, f_0)$  is the simulated impedance assuming ideal components.  $Z_r(\text{sim}, f_0)$  is the simulated impedance when the empirically estimated tolerance of 1% and serial parasitic resistance of  $0.11\Omega$  and  $0.03\Omega$  are added to each inductor and capacitor, with  $\Delta Z_r(\text{sim}, f_0)$  being the corresponding standard deviation in simulated impedance due to the 1% tolerance.  $Z(\text{exp}, f_0)$  and  $Z(\text{exp}, f_{\text{exp.}})$  are the experimentally measured impedance at  $f_0 = 795$  kHz and  $f_{\text{exp.}} = 740$  kHz respectively.

| $k_y$ | $k_z$ | $Z_i(\text{sim}, f_0)/\Omega$ | $Z_r(\text{sim}, f_0)/\Omega$ | $\Delta Z_r(\text{sim}, f_0)/\Omega$ | $Z(\text{exp}, f_0)/\Omega$ | $Z(\text{exp}, f_{\text{exp.}})/\Omega$ |
|-------|-------|-------------------------------|-------------------------------|--------------------------------------|-----------------------------|-----------------------------------------|
| 0.01  | 0.42  | 320                           | 322.9                         | 46.7                                 | 252.3                       | 298.6                                   |
| 0.53  | 0.48  | 339.8                         | 357.2                         | 58.2                                 | 193.0                       | 228.1                                   |
| 0.86  | 0.62  | 286.8                         | 290.8                         | 34.8                                 | 252.3                       | 389.2                                   |
| 1.02  | 0.75  | 391.3                         | 542.1                         | 117                                  | 311.6                       | 555.0                                   |
| 1.10  | 0.88  | 323.7                         | 364.7                         | 76.6                                 | 212.3                       | 398.7                                   |
| 0.96  | 1.07  | 98.2                          | 108.6                         | 19.3                                 | 200.7                       | 268.9                                   |
| 0.53  | 1.12  | 266.8                         | 310                           | 36.9                                 | 256.4                       | 338.2                                   |
| 0.07  | 1.26  | 77906.9                       | 347.2                         | 87.5                                 | 208.4                       | 365.7                                   |
| 0.08  | 0.86  | 130.8                         | 132.8                         | 5.2                                  | 351.9                       | 112.9                                   |
| 0.27  | 0.92  | 139.6                         | 142.6                         | 6.9                                  | 311.6                       | 137.6                                   |
| 0.28  | 0.71  | 149.1                         | 153.2                         | 6.8                                  | 458.0                       | 152.0                                   |
| 0.90  | 1.28  | 322.4                         | 77.1                          | 30.8                                 | 216.2                       | 172.2                                   |
| 1.24  | 0.35  | 75                            | 69.9                          | 6.9                                  | 65.8                        | 112.9                                   |
| 0.71  | 0.14  | 123.4                         | 120.8                         | 5.0                                  | 109.4                       | 62.5                                    |

**Supplementary Table 4:** Simulated data of impedance values for a Hopf Link circuit with N=9. Impedance values in each column correspond to impedance of points  $k_y, k_z$  within a k radius of 0.03 from a particular centered point  $k_{y0}, k_{z0}$ , in which  $\sqrt{(k_y - k_{y0})^2 + (k_z - k_{z0})^2} < 0.03$ . This table shows only part of the full dataset, the full dataset is distributed over Tables 4-14.

| $Z(k_{y0}=0.01$<br>$k_{z0}=0.42)/\Omega$ | $Z(k_{y0}=0.53$<br>$k_{z0}=0.48)/\Omega$ | $Z(k_{y0}=0.86$<br>$k_{z0}=0.62)/\Omega$ | $Z(k_{y0}=1.02$<br>$k_{z0}=0.75)/\Omega$ | $Z(k_{y0}=1.10$<br>$k_{z0}=0.88)/\Omega$ | $Z(k_{y0}=0.96$<br>$k_{z0}=1.07)/\Omega$ | $Z(k_{y0}=0.53$<br>$k_{z0}=1.12)/\Omega$ |
|------------------------------------------|------------------------------------------|------------------------------------------|------------------------------------------|------------------------------------------|------------------------------------------|------------------------------------------|
| 318.8                                    | 339.2                                    | 282.8                                    | 362.8                                    | 309                                      | 109.1                                    | 266.6                                    |
| 451.7                                    | 340.6                                    | 274.2                                    | 324.3                                    | 280.4                                    | 137.6                                    | 318.3                                    |
| 420.3                                    | 329.8                                    | 295.6                                    | 315.9                                    | 281.3                                    | 104.2                                    | 291.5                                    |
| 395.8                                    | 320.7                                    | 289                                      | 308.1                                    | 282.7                                    | 79.6                                     | 275.6                                    |
| 376.4                                    | 313.1                                    | 283.6                                    | 300.9                                    | 284.4                                    | 76.6                                     | 272.2                                    |
| 360.6                                    | 397                                      | 279.2                                    | 294.3                                    | 286.4                                    | 85.8                                     | 344.8                                    |
| 347.5                                    | 375.1                                    | 275.5                                    | 288.2                                    | 288.9                                    | 95.5                                     | 349.7                                    |
| 336.4                                    | 357.8                                    | 272.5                                    | 282.6                                    | 291.8                                    | 105.2                                    | 335.3                                    |
| 326.9                                    | 343.9                                    | 270                                      | 355.2                                    | 295.1                                    | 114.5                                    | 307.2                                    |
| 318.7                                    | 332.5                                    | 267.9                                    | 344.6                                    | 284.2                                    | 123.3                                    | 283.2                                    |
| 311.4                                    | 323                                      | 266                                      | 334.6                                    | 284.4                                    | 163.4                                    | 272.2                                    |
| 304.8                                    | 315                                      | 318                                      | 325.3                                    | 285.1                                    | 123.6                                    | 272.8                                    |
| 298.9                                    | 308.2                                    | 307.4                                    | 316.6                                    | 286.1                                    | 93.9                                     | 281.1                                    |
| 293.4                                    | 302.2                                    | 298.6                                    | 308.7                                    | 287.4                                    | 72.4                                     | 294.8                                    |
| 288.4                                    | 296.9                                    | 291.4                                    | 301.3                                    | 289.2                                    | 79.4                                     | 313                                      |
| 283.7                                    | 434.5                                    | 285.5                                    | 294.6                                    | 291.3                                    | 88.8                                     | 319.7                                    |
| 279.3                                    | 404.1                                    | 280.8                                    | 288.4                                    | 293.9                                    | 98.5                                     | 337.5                                    |
| 451.7                                    | 380.6                                    | 276.9                                    | 282.7                                    | 296.8                                    | 107.9                                    | 350.4                                    |
| 420.3                                    | 362.1                                    | 273.7                                    | 277.6                                    | 300.3                                    | 117                                      | 347.9                                    |
| 395.9                                    | 347.3                                    | 271.1                                    | 381.3                                    | 304.3                                    | 125.7                                    | 325.3                                    |
| 318.8                                    | 339.2                                    | 282.8                                    | 362.8                                    | 309                                      | 109.1                                    | 266.6                                    |
| 451.7                                    | 340.6                                    | 274.2                                    | 324.3                                    | 280.4                                    | 137.6                                    | 318.3                                    |
| 420.3                                    | 329.8                                    | 295.6                                    | 315.9                                    | 281.3                                    | 104.2                                    | 291.5                                    |
| 395.8                                    | 320.7                                    | 289                                      | 308.1                                    | 282.7                                    | 79.6                                     | 275.6                                    |
| 376.4                                    | 313.1                                    | 283.6                                    | 300.9                                    | 284.4                                    | 76.6                                     | 272.2                                    |
| 360.6                                    | 397                                      | 279.2                                    | 294.3                                    | 286.4                                    | 85.8                                     | 344.8                                    |
| 347.5                                    | 375.1                                    | 275.5                                    | 288.2                                    | 288.9                                    | 95.5                                     | 349.7                                    |
| 336.4                                    | 357.8                                    | 272.5                                    | 282.6                                    | 291.8                                    | 105.2                                    | 335.3                                    |
| 326.9                                    | 343.9                                    | 270                                      | 355.2                                    | 295.1                                    | 114.5                                    | 307.2                                    |
| 318.7                                    | 332.5                                    | 267.9                                    | 344.6                                    | 284.2                                    | 123.3                                    | 283.2                                    |
| 311.4                                    | 323                                      | 266                                      | 334.6                                    | 284.4                                    | 163.4                                    | 272.2                                    |
| 304.8                                    | 315                                      | 318                                      | 325.3                                    | 285.1                                    | 123.6                                    | 272.8                                    |
| 298.9                                    | 308.2                                    | 307.4                                    | 316.6                                    | 286.1                                    | 93.9                                     | 281.1                                    |
| 293.4                                    | 302.2                                    | 298.6                                    | 308.7                                    | 287.4                                    | 72.4                                     | 294.8                                    |
| 288.4                                    | 296.9                                    | 291.4                                    | 301.3                                    | 289.2                                    | 79.4                                     | 313                                      |
| 283.7                                    | 434.5                                    | 285.5                                    | 294.6                                    | 291.3                                    | 88.8                                     | 319.7                                    |

**Supplementary Table 5:** Simulated data of impedance values for a Hopf Link circuit with  $N=9$ . Impedance values in each column correspond to impedance of points  $k_y, k_z$  within a  $k$  radius of 0.03 from a particular centered point  $k_{y0}, k_{z0}$ , in which  $\sqrt{(k_y - k_{y0})^2 + (k_z - k_{z0})^2} < 0.03$ . This table shows only part of the full dataset, the full dataset is distributed over Tables 4-14.

| $Z(k_{y0}=0.01$<br>$k_{z0}=0.42)/\Omega$ | $Z(k_{y0}=0.53$<br>$k_{z0}=0.48)/\Omega$ | $Z(k_{y0}=0.86$<br>$k_{z0}=0.62)/\Omega$ | $Z(k_{y0}=1.02$<br>$k_{z0}=0.75)/\Omega$ | $Z(k_{y0}=1.10$<br>$k_{z0}=0.88)/\Omega$ | $Z(k_{y0}=0.96$<br>$k_{z0}=1.07)/\Omega$ | $Z(k_{y0}=0.53$<br>$k_{z0}=1.12)/\Omega$ |
|------------------------------------------|------------------------------------------|------------------------------------------|------------------------------------------|------------------------------------------|------------------------------------------|------------------------------------------|
| 279.3                                    | 404.1                                    | 280.8                                    | 288.4                                    | 293.9                                    | 98.5                                     | 337.5                                    |
| 451.7                                    | 380.6                                    | 276.9                                    | 282.7                                    | 296.8                                    | 107.9                                    | 350.4                                    |
| 420.3                                    | 362.1                                    | 273.7                                    | 277.6                                    | 300.3                                    | 117                                      | 347.9                                    |
| 395.9                                    | 347.3                                    | 271.1                                    | 381.3                                    | 304.3                                    | 125.7                                    | 325.3                                    |
| 376.4                                    | 335.3                                    | 268.9                                    | 369.1                                    | 308.9                                    | 134                                      | 296.1                                    |
| 360.6                                    | 325.4                                    | 267.1                                    | 357.3                                    | 289                                      | 258.9                                    | 276.6                                    |
| 347.5                                    | 317.1                                    | 265.4                                    | 346.2                                    | 288.9                                    | 194.3                                    | 270.6                                    |
| 336.4                                    | 310                                      | 337.3                                    | 335.7                                    | 289.2                                    | 146.7                                    | 274.6                                    |
| 327                                      | 303.8                                    | 323.1                                    | 326.1                                    | 289.8                                    | 111.3                                    | 285.2                                    |
| 318.7                                    | 298.3                                    | 311.4                                    | 317.2                                    | 290.8                                    | 84.9                                     | 300.6                                    |
| 311.4                                    | 293.4                                    | 301.8                                    | 309.1                                    | 292.2                                    | 73.4                                     | 320.6                                    |
| 304.8                                    | 288.9                                    | 294                                      | 301.7                                    | 294                                      | 82.3                                     | 345.7                                    |
| 298.9                                    | 488.6                                    | 287.6                                    | 294.8                                    | 296.2                                    | 91.8                                     | 310                                      |
| 293.4                                    | 444.7                                    | 282.4                                    | 288.6                                    | 298.9                                    | 101.3                                    | 328.2                                    |
| 288.4                                    | 411.7                                    | 278.3                                    | 282.9                                    | 302                                      | 110.6                                    | 345.4                                    |
| 283.7                                    | 386.4                                    | 274.9                                    | 277.6                                    | 305.6                                    | 119.4                                    | 353.5                                    |
| 279.3                                    | 366.7                                    | 272.2                                    | 410.9                                    | 309.7                                    | 127.9                                    | 341.9                                    |
| 275.1                                    | 351                                      | 270                                      | 397.9                                    | 314.5                                    | 136.1                                    | 313.3                                    |
| 451.9                                    | 338.3                                    | 268.1                                    | 384.6                                    | 319.9                                    | 144.1                                    | 286.1                                    |
| 420.4                                    | 327.9                                    | 266.5                                    | 371.5                                    | 293.9                                    | 231.3                                    | 272                                      |
| 396                                      | 319.2                                    | 265.1                                    | 359.1                                    | 293.8                                    | 174.2                                    | 270.5                                    |
| 376.5                                    | 311.9                                    | 363.6                                    | 347.4                                    | 294                                      | 132                                      | 277.4                                    |
| 360.7                                    | 305.5                                    | 344.4                                    | 336.7                                    | 294.7                                    | 100.4                                    | 290.1                                    |
| 347.6                                    | 299.9                                    | 328.6                                    | 326.8                                    | 295.7                                    | 77                                       | 307.2                                    |
| 336.5                                    | 294.8                                    | 315.8                                    | 317.7                                    | 297.1                                    | 76.1                                     | 329                                      |
| 327                                      | 290.3                                    | 305.3                                    | 309.5                                    | 299                                      | 85.2                                     | 356.3                                    |
| 318.7                                    | 286                                      | 296.7                                    | 301.9                                    | 301.3                                    | 94.7                                     | 391.4                                    |
| 311.4                                    | 570.3                                    | 289.8                                    | 295.1                                    | 304                                      | 104                                      | 318.2                                    |
| 304.8                                    | 503.9                                    | 284.2                                    | 288.8                                    | 307.2                                    | 113.1                                    | 337                                      |
| 298.9                                    | 455.8                                    | 279.7                                    | 283                                      | 311                                      | 121.7                                    | 352.2                                    |
| 293.5                                    | 420                                      | 276.2                                    | 277.7                                    | 315.3                                    | 130                                      | 352.9                                    |
| 288.4                                    | 392.7                                    | 273.3                                    | 440.4                                    | 320.2                                    | 138                                      | 331.8                                    |
| 283.7                                    | 371.5                                    | 271                                      | 429.6                                    | 325.9                                    | 146                                      | 300.8                                    |
| 279.3                                    | 354.9                                    | 269.2                                    | 416.3                                    | 332.3                                    | 153.9                                    | 278                                      |
| 275.1                                    | 341.5                                    | 267.6                                    | 401.8                                    | 299.4                                    | 274.9                                    | 269.3                                    |
| 452.1                                    | 330.5                                    | 266.2                                    | 387.4                                    | 298.9                                    | 207                                      | 271.7                                    |

**Supplementary Table 6:** Simulated data of impedance values for a Hopf Link circuit with  $N=9$ . Impedance values in each column correspond to impedance of points  $k_y, k_z$  within a  $k$  radius of 0.03 from a particular centered point  $k_{y0}, k_{z0}$ , in which  $\sqrt{(k_y - k_{y0})^2 + (k_z - k_{z0})^2} < 0.03$ . This table shows only part of the full dataset, the full dataset is distributed over Tables 4-14.

| $Z(k_{y0}=0.01$<br>$k_{z0}=0.42)/\Omega$ | $Z(k_{y0}=0.53$<br>$k_{z0}=0.48)/\Omega$ | $Z(k_{y0}=0.86$<br>$k_{z0}=0.62)/\Omega$ | $Z(k_{y0}=1.02$<br>$k_{z0}=0.75)/\Omega$ | $Z(k_{y0}=1.10$<br>$k_{z0}=0.88)/\Omega$ | $Z(k_{y0}=0.96$<br>$k_{z0}=1.07)/\Omega$ | $Z(k_{y0}=0.53$<br>$k_{z0}=1.12)/\Omega$ |
|------------------------------------------|------------------------------------------|------------------------------------------|------------------------------------------|------------------------------------------|------------------------------------------|------------------------------------------|
| 420.6                                    | 321.4                                    | 264.9                                    | 373.5                                    | 298.7                                    | 156.6                                    | 281.2                                    |
| 396.1                                    | 313.8                                    | 373.5                                    | 360.5                                    | 298.9                                    | 119.1                                    | 295.6                                    |
| 376.6                                    | 307.2                                    | 352.1                                    | 348.4                                    | 299.6                                    | 90.8                                     | 314.5                                    |
| 360.8                                    | 301.4                                    | 334.8                                    | 337.4                                    | 300.6                                    | 70.4                                     | 338.1                                    |
| 347.6                                    | 296.3                                    | 320.6                                    | 327.3                                    | 302.1                                    | 78.9                                     | 368.1                                    |
| 336.6                                    | 291.6                                    | 309.1                                    | 318.2                                    | 304                                      | 88.1                                     | 406.7                                    |
| 327.1                                    | 287.3                                    | 299.7                                    | 309.8                                    | 306.3                                    | 97.5                                     | 458.2                                    |
| 318.8                                    | 594.6                                    | 292.1                                    | 302.2                                    | 309.2                                    | 106.7                                    | 308.4                                    |
| 311.5                                    | 520.9                                    | 286.1                                    | 295.3                                    | 312.5                                    | 115.5                                    | 327                                      |
| 304.9                                    | 467.9                                    | 281.2                                    | 288.9                                    | 316.4                                    | 123.9                                    | 345.6                                    |
| 298.9                                    | 428.9                                    | 277.4                                    | 283.2                                    | 320.9                                    | 132                                      | 356.5                                    |
| 293.5                                    | 399.5                                    | 274.4                                    | 458                                      | 326.1                                    | 139.9                                    | 347.5                                    |
| 288.5                                    | 376.8                                    | 272.1                                    | 449.2                                    | 331.9                                    | 147.8                                    | 319                                      |
| 283.7                                    | 359                                      | 270.2                                    | 436.1                                    | 338.6                                    | 155.6                                    | 289.2                                    |
| 279.3                                    | 344.8                                    | 268.6                                    | 420.8                                    | 346.3                                    | 163.4                                    | 272.1                                    |
| 275.1                                    | 333.3                                    | 267.3                                    | 405                                      | 304.5                                    | 246.2                                    | 268.4                                    |
| 452.5                                    | 323.8                                    | 266.1                                    | 389.6                                    | 303.8                                    | 185.9                                    | 274.1                                    |
| 420.9                                    | 315.8                                    | 384.5                                    | 375                                      | 303.6                                    | 141.2                                    | 285.7                                    |
| 396.3                                    | 309                                      | 360.7                                    | 361.5                                    | 303.8                                    | 107.6                                    | 301.9                                    |
| 376.8                                    | 303                                      | 341.5                                    | 349.2                                    | 304.5                                    | 82.4                                     | 322.4                                    |
| 360.9                                    | 297.7                                    | 325.9                                    | 337.9                                    | 305.5                                    | 72.9                                     | 348.2                                    |
| 347.8                                    | 293                                      | 313.2                                    | 327.7                                    | 307                                      | 81.6                                     | 381                                      |
| 336.7                                    | 288.6                                    | 302.9                                    | 318.5                                    | 309                                      | 90.9                                     | 423.8                                    |
| 327.2                                    | 284.6                                    | 294.7                                    | 310.1                                    | 311.4                                    | 100.2                                    | 481.2                                    |
| 318.9                                    | 621.8                                    | 288.1                                    | 302.4                                    | 314.4                                    | 109.1                                    | 316.8                                    |
| 311.5                                    | 539.6                                    | 282.8                                    | 295.5                                    | 317.9                                    | 117.7                                    | 336.2                                    |
| 305                                      | 481.3                                    | 278.7                                    | 289.1                                    | 321.9                                    | 125.9                                    | 353.3                                    |
| 299                                      | 438.7                                    | 275.5                                    | 283.4                                    | 326.6                                    | 133.9                                    | 356.9                                    |
| 293.5                                    | 406.8                                    | 273.1                                    | 473.1                                    | 332                                      | 141.7                                    | 337.4                                    |
| 288.5                                    | 382.4                                    | 271.1                                    | 468.5                                    | 338.1                                    | 149.5                                    | 305.1                                    |
| 283.8                                    | 363.4                                    | 269.6                                    | 456.9                                    | 345.1                                    | 157.2                                    | 279.5                                    |
| 279.4                                    | 348.3                                    | 268.3                                    | 441.5                                    | 353.1                                    | 165                                      | 268.3                                    |
| 452.9                                    | 336.2                                    | 267.2                                    | 424.5                                    | 309.5                                    | 220.9                                    | 269                                      |
| 421.2                                    | 326.2                                    | 266.1                                    | 407.5                                    | 308.9                                    | 167.4                                    | 277.4                                    |
| 396.6                                    | 317.9                                    | 396.8                                    | 391.3                                    | 308.6                                    | 127.6                                    | 291                                      |
| 377                                      | 310.8                                    | 370.3                                    | 376.1                                    | 308.8                                    | 97.4                                     | 308.8                                    |

**Supplementary Table 7:** Simulated data of impedance values for a Hopf Link circuit with  $N=9$ . Impedance values in each column correspond to impedance of points  $k_y, k_z$  within a  $k$  radius of 0.03 from a particular centered point  $k_{y0}, k_{z0}$ , in which  $\sqrt{(k_y - k_{y0})^2 + (k_z - k_{z0})^2} < 0.03$ . This table shows only part of the full dataset, the full dataset is distributed over Tables 4-14.

| $Z(k_{y0}=0.01$<br>$k_{z0}=0.42)/\Omega$ | $Z(k_{y0}=0.53$<br>$k_{z0}=0.48)/\Omega$ | $Z(k_{y0}=0.86$<br>$k_{z0}=0.62)/\Omega$ | $Z(k_{y0}=1.02$<br>$k_{z0}=0.75)/\Omega$ | $Z(k_{y0}=1.10$<br>$k_{z0}=0.88)/\Omega$ | $Z(k_{y0}=0.96$<br>$k_{z0}=1.07)/\Omega$ | $Z(k_{y0}=0.53$<br>$k_{z0}=1.12)/\Omega$ |
|------------------------------------------|------------------------------------------|------------------------------------------|------------------------------------------|------------------------------------------|------------------------------------------|------------------------------------------|
| 361.1                                    | 304.7                                    | 348.9                                    | 362.3                                    | 309.4                                    | 75.1                                     | 331.2                                    |
| 347.9                                    | 299.3                                    | 331.7                                    | 349.7                                    | 310.5                                    | 75.5                                     | 359.3                                    |
| 336.8                                    | 294.4                                    | 317.7                                    | 338.3                                    | 312.1                                    | 84.4                                     | 395.4                                    |
| 327.3                                    | 290                                      | 306.5                                    | 328                                      | 314.1                                    | 93.6                                     | 442.9                                    |
| 319                                      | 285.8                                    | 297.4                                    | 318.7                                    | 316.6                                    | 102.7                                    | 507.1                                    |
| 311.6                                    | 652.4                                    | 290.2                                    | 310.3                                    | 319.6                                    | 111.5                                    | 325.8                                    |
| 305                                      | 560.5                                    | 284.5                                    | 302.6                                    | 323.3                                    | 119.9                                    | 345.5                                    |
| 299.1                                    | 496                                      | 280.1                                    | 295.7                                    | 327.5                                    | 127.9                                    | 358.6                                    |
| 293.6                                    | 449.3                                    | 276.6                                    | 289.4                                    | 332.3                                    | 135.8                                    | 352                                      |
| 288.6                                    | 414.7                                    | 274                                      | 483.2                                    | 338                                      | 143.5                                    | 323.6                                    |
| 283.9                                    | 388.4                                    | 272.1                                    | 485.7                                    | 344.4                                    | 151.1                                    | 292                                      |
| 279.4                                    | 368.1                                    | 270.5                                    | 477.9                                    | 351.7                                    | 158.8                                    | 272.2                                    |
| 421.7                                    | 352.1                                    | 269.3                                    | 463.5                                    | 360.1                                    | 166.5                                    | 266.6                                    |
| 397                                      | 339.2                                    | 268.3                                    | 445.9                                    | 314.6                                    | 198.7                                    | 270.9                                    |
| 377.3                                    | 328.7                                    | 267.3                                    | 427.4                                    | 313.9                                    | 151.2                                    | 281.6                                    |
| 361.4                                    | 320                                      | 410.5                                    | 409.3                                    | 313.6                                    | 115.5                                    | 296.9                                    |
| 348.1                                    | 312.7                                    | 380.8                                    | 392.4                                    | 313.8                                    | 88.4                                     | 316.4                                    |
| 337                                      | 306.4                                    | 357.1                                    | 376.9                                    | 314.4                                    | 69.7                                     | 340.8                                    |
| 327.4                                    | 300.8                                    | 338                                      | 362.8                                    | 315.5                                    | 78.1                                     | 371.6                                    |
| 319.1                                    | 295.8                                    | 322.7                                    | 350                                      | 317.1                                    | 87.1                                     | 411.4                                    |
| 311.7                                    | 291.3                                    | 310.3                                    | 338.5                                    | 319.2                                    | 96.2                                     | 464.4                                    |
| 305.1                                    | 287.1                                    | 300.4                                    | 328.2                                    | 321.8                                    | 105.2                                    | 536                                      |
| 299.2                                    | 687                                      | 292.5                                    | 318.9                                    | 324.9                                    | 113.7                                    | 335.4                                    |
| 293.7                                    | 583.8                                    | 286.3                                    | 310.5                                    | 328.7                                    | 121.9                                    | 353.9                                    |
| 288.7                                    | 512.2                                    | 281.4                                    | 302.9                                    | 333.1                                    | 129.8                                    | 359.8                                    |
| 283.9                                    | 461                                      | 277.8                                    | 296                                      | 338.2                                    | 137.5                                    | 341.5                                    |
| 397.4                                    | 423.3                                    | 275                                      | 485.2                                    | 344                                      | 145.1                                    | 308.5                                    |
| 377.6                                    | 394.9                                    | 272.9                                    | 498.2                                    | 350.7                                    | 152.7                                    | 280.8                                    |
| 361.6                                    | 373.1                                    | 271.4                                    | 497.2                                    | 358.4                                    | 160.3                                    | 267.4                                    |
| 348.4                                    | 356                                      | 270.3                                    | 485.9                                    | 367.1                                    | 167.9                                    | 266.6                                    |
| 337.2                                    | 342.4                                    | 269.3                                    | 468.8                                    | 319.7                                    | 179.3                                    | 273.9                                    |
| 327.6                                    | 331.4                                    | 268.5                                    | 449.2                                    | 318.9                                    | 136.9                                    | 286.6                                    |
| 319.3                                    | 322.3                                    | 425.8                                    | 429.4                                    | 318.6                                    | 104.8                                    | 303.6                                    |
| 311.9                                    | 314.7                                    | 392.5                                    | 410.5                                    | 318.8                                    | 80.5                                     | 324.8                                    |
| 305.3                                    | 308.1                                    | 366.1                                    | 393.1                                    | 319.4                                    | 72.1                                     | 351.4                                    |
| 299.3                                    | 302.4                                    | 345                                      | 377.2                                    | 320.5                                    | 80.7                                     | 385.2                                    |

**Supplementary Table 8:** Simulated data of impedance values for a Hopf Link circuit with  $N=9$ . Impedance values in each column correspond to impedance of points  $k_y, k_z$  within a  $k$  radius of 0.03 from a particular centered point  $k_{y0}, k_{z0}$ , in which  $\sqrt{(k_y - k_{y0})^2 + (k_z - k_{z0})^2} < 0.03$ . This table shows only part of the full dataset, the full dataset is distributed over Tables 4-14.

| $Z(k_{y0}=0.01$<br>$k_{z0}=0.42)/\Omega$ | $Z(k_{y0}=0.53$<br>$k_{z0}=0.48)/\Omega$ | $Z(k_{y0}=0.86$<br>$k_{z0}=0.62)/\Omega$ | $Z(k_{y0}=1.02$<br>$k_{z0}=0.75)/\Omega$ | $Z(k_{y0}=1.10$<br>$k_{z0}=0.88)/\Omega$ | $Z(k_{y0}=0.96$<br>$k_{z0}=1.07)/\Omega$ | $Z(k_{y0}=0.53$<br>$k_{z0}=1.12)/\Omega$ |
|------------------------------------------|------------------------------------------|------------------------------------------|------------------------------------------|------------------------------------------|------------------------------------------|------------------------------------------|
| 293.8                                    | 297.3                                    | 328.1                                    | 363                                      | 322.2                                    | 89.7                                     | 429.3                                    |
| 288.8                                    | 292.7                                    | 314.5                                    | 350.1                                    | 324.3                                    | 98.8                                     | 488.6                                    |
| 362                                      | 288.5                                    | 303.6                                    | 338.7                                    | 327                                      | 107.5                                    | 567.9                                    |
| 348.6                                    | 726.3                                    | 294.9                                    | 328.3                                    | 330.3                                    | 115.8                                    | 360                                      |
| 337.4                                    | 610                                      | 288.1                                    | 319.1                                    | 334.2                                    | 123.8                                    | 355.1                                    |
| 327.8                                    | 530.2                                    | 282.9                                    | 310.7                                    | 338.7                                    | 131.6                                    | 326.8                                    |
| 319.4                                    | 473.8                                    | 278.9                                    | 502.6                                    | 344                                      | 139.2                                    | 297.5                                    |
| 312                                      | 432.7                                    | 275.9                                    | 512.2                                    | 350.1                                    | 146.7                                    | 272.3                                    |
| 305.4                                    | 401.9                                    | 273.8                                    | 507.2                                    | 357.1                                    | 154.2                                    | 264.9                                    |
| 299.4                                    | 378.5                                    | 272.3                                    | 492.4                                    | 365.1                                    | 161.7                                    | 268                                      |
| N/A                                      | 360.3                                    | 271.1                                    | 472.7                                    | 324                                      | 169.3                                    | 277.9                                    |
| N/A                                      | 345.8                                    | 270.3                                    | 451.5                                    | 323.6                                    | 124.2                                    | 292.3                                    |
| N/A                                      | 334.2                                    | 405.5                                    | 430.6                                    | 323.7                                    | 95.2                                     | 310.9                                    |
| N/A                                      | 324.7                                    | 376.1                                    | 411.1                                    | 324.4                                    | 73.6                                     | 334                                      |
| N/A                                      | 316.7                                    | 352.7                                    | 393.3                                    | 325.5                                    | 74.6                                     | 363                                      |
| N/A                                      | 309.9                                    | 334                                      | 377.3                                    | 327.2                                    | 83.3                                     | 400.3                                    |
| N/A                                      | 304                                      | 319.1                                    | 362.9                                    | 329.4                                    | 92.3                                     | 449.4                                    |
| N/A                                      | 298.8                                    | 307.1                                    | 350.1                                    | 332.2                                    | 101.2                                    | 515.7                                    |
| N/A                                      | 294.1                                    | 297.6                                    | 338.6                                    | 335.6                                    | 109.7                                    | 601.9                                    |
| N/A                                      | 639.3                                    | 290.2                                    | 328.4                                    | 339.6                                    | 117.9                                    | 361.7                                    |
| N/A                                      | 550.2                                    | 284.4                                    | 319.2                                    | 344.3                                    | 125.7                                    | 344                                      |
| N/A                                      | 487.8                                    | 280.1                                    | 495.7                                    | 349.8                                    | 133.3                                    | 310.2                                    |
| N/A                                      | 442.8                                    | 276.9                                    | 519.4                                    | 356.2                                    | 140.8                                    | 285.8                                    |
| N/A                                      | 409.5                                    | 274.6                                    | 524.8                                    | 363.5                                    | 148.2                                    | 266.5                                    |
| N/A                                      | 384.3                                    | 273                                      | 515.5                                    | 371.9                                    | 155.6                                    | 264.3                                    |
| N/A                                      | 364.8                                    | 272                                      | 497.4                                    | 328.6                                    | 163.1                                    | 270.7                                    |
| N/A                                      | 349.4                                    | 271.2                                    | 475.4                                    | 328.7                                    | 86.7                                     | 282.6                                    |
| N/A                                      | 337.1                                    | 387.1                                    | 452.7                                    | 329.3                                    | 68.9                                     | 298.7                                    |
| N/A                                      | 327.1                                    | 361.2                                    | 431                                      | 330.5                                    | 77.1                                     | 319                                      |
| N/A                                      | 318.8                                    | 340.5                                    | 411                                      | 332.2                                    | 85.9                                     | 344.2                                    |
| N/A                                      | 311.8                                    | 324.1                                    | 393.1                                    | 334.5                                    | 94.8                                     | 375.9                                    |
| N/A                                      | 305.7                                    | 310.9                                    | 377                                      | 337.4                                    | 103.5                                    | 417.1                                    |
| N/A                                      | 300.4                                    | 300.5                                    | 362.7                                    | 340.9                                    | 111.8                                    | 472.1                                    |
| N/A                                      | 295.6                                    | 292.3                                    | 349.9                                    | 345.1                                    | 119.7                                    | 545.9                                    |
| N/A                                      | 572.4                                    | 286                                      | 338.6                                    | 350                                      | 127.4                                    | 330.3                                    |
| N/A                                      | 503.3                                    | 281.3                                    | 515.4                                    | 355.7                                    | 134.9                                    | 304.6                                    |



**Supplementary Table 9:** Simulated data of impedance values for a Hopf Link circuit with  $N=9$ . Impedance values in each column correspond to impedance of points  $k_y, k_z$  within a  $k$  radius of 0.03 from a particular centered point  $k_{y0}, k_{z0}$ , in which  $\sqrt{(k_y - k_{y0})^2 + (k_z - k_{z0})^2} < 0.03$ . This table shows only part of the full dataset, the full dataset is distributed over Tables 4-14.

| $Z(k_{y0}=0.01$<br>$k_{z0}=0.42)/\Omega$ | $Z(k_{y0}=0.53$<br>$k_{z0}=0.48)/\Omega$ | $Z(k_{y0}=0.86$<br>$k_{z0}=0.62)/\Omega$ | $Z(k_{y0}=1.02$<br>$k_{z0}=0.75)/\Omega$ | $Z(k_{y0}=1.10$<br>$k_{z0}=0.88)/\Omega$ | $Z(k_{y0}=0.96$<br>$k_{z0}=1.07)/\Omega$ | $Z(k_{y0}=0.53$<br>$k_{z0}=1.12)/\Omega$ |
|------------------------------------------|------------------------------------------|------------------------------------------|------------------------------------------|------------------------------------------|------------------------------------------|------------------------------------------|
| N/A                                      | 453.9                                    | 277.8                                    | 535.3                                    | 362.3                                    | 142.3                                    | 271.9                                    |
| N/A                                      | 417.7                                    | 275.4                                    | 535.7                                    | 369.9                                    | 149.6                                    | 263.2                                    |
| N/A                                      | 390.5                                    | 273.8                                    | 522                                      | 333.6                                    | 157                                      | 265.2                                    |
| N/A                                      | 369.6                                    | 272.7                                    | 500.8                                    | 334.2                                    | 71.2                                     | 274.3                                    |
| N/A                                      | 353.2                                    | 370.5                                    | 476.8                                    | 335.4                                    | 79.6                                     | 288.1                                    |
| N/A                                      | 340.2                                    | 347.7                                    | 453                                      | 337.2                                    | 88.4                                     | 305.8                                    |
| N/A                                      | 329.7                                    | 329.6                                    | 430.7                                    | 339.5                                    | 97.2                                     | 327.8                                    |
| N/A                                      | 321                                      | 315.1                                    | 410.5                                    | 342.5                                    | 105.7                                    | 355.3                                    |
| N/A                                      | 313.7                                    | 303.7                                    | 392.5                                    | 346.1                                    | 113.8                                    | 390.2                                    |
| N/A                                      | 307.5                                    | 294.7                                    | 376.5                                    | 350.5                                    | 121.5                                    | 436                                      |
| N/A                                      | 302                                      | 287.8                                    | 362.2                                    | 355.6                                    | 129.1                                    | 497.5                                    |
| N/A                                      | 466.1                                    | 282.6                                    | 549.5                                    | 361.5                                    | 136.4                                    | 265.2                                    |
| N/A                                      | 426.6                                    | 278.8                                    | 544.5                                    | 368.4                                    | 143.7                                    | 262                                      |
| N/A                                      | 397.2                                    | 276.1                                    | 526.5                                    | 340.2                                    | 151                                      | 267.5                                    |
| N/A                                      | 374.7                                    | 319.7                                    | 502.5                                    | 342.1                                    | 90.8                                     | 278.8                                    |
| N/A                                      | 357.3                                    | 307.1                                    | 476.9                                    | 344.5                                    | 99.5                                     | 294.2                                    |
| N/A                                      | 343.5                                    | 297.3                                    | 452.3                                    | 347.6                                    | 107.7                                    | 313.6                                    |
| N/A                                      | 332.4                                    | 289.6                                    | 429.8                                    | 351.3                                    | 115.6                                    | 337.5                                    |
| N/A                                      | 323.3                                    | 283.9                                    | 409.5                                    | 355.8                                    | 123.2                                    | 367.5                                    |
| N/A                                      | 315.7                                    | N/A                                      | N/A                                      | 361.1                                    | 130.6                                    | 406.1                                    |
| N/A                                      | 380.2                                    | N/A                                      | N/A                                      | N/A                                      | 137.9                                    | 284.1                                    |
| N/A                                      | 361.6                                    | N/A                                      | N/A                                      | N/A                                      | N/A                                      | 301.1                                    |
| N/A                                      | 346.9                                    | N/A                                      | N/A                                      | N/A                                      | N/A                                      | 322.1                                    |

**Supplementary Table 10:** Simulated data of impedance values for a Hopf Link circuit with  $N=9$ . Impedance values in each column correspond to impedance of points  $k_y, k_z$  within a  $k$  radius of 0.03 from a particular centered point  $k_{y0}, k_{z0}$ , in which  $\sqrt{(k_y - k_{y0})^2 + (k_z - k_{z0})^2} < 0.03$ . This table shows only part of the full dataset, the full dataset is distributed over Tables 4-14.

| $Z(k_{y0}=0.07$<br>$k_{z0}=1.26)/\Omega$ | $Z(k_{y0}=0.08$<br>$k_{z0}=0.86)/\Omega$ | $Z(k_{y0}=0.27$<br>$k_{z0}=0.92)/\Omega$ | $Z(k_{y0}=0.28$<br>$k_{z0}=0.71)/\Omega$ | $Z(k_{y0}=0.9$<br>$k_{z0}=1.28)/\Omega$ | $Z(k_{y0}=1.24$<br>$k_{z0}=0.35)/\Omega$ | $Z(k_{y0}=0.71$<br>$k_{z0}=0.14)/\Omega$ |
|------------------------------------------|------------------------------------------|------------------------------------------|------------------------------------------|-----------------------------------------|------------------------------------------|------------------------------------------|
| 259.1                                    | 130.8                                    | 139.4                                    | 148.7                                    | 77.9                                    | 75.1                                     | 123.3                                    |
| 373.5                                    | 130.4                                    | 137.4                                    | 150.2                                    | 94                                      | 80.4                                     | 125.3                                    |
| 277.1                                    | 130.5                                    | 137.8                                    | 149.4                                    | 85.1                                    | 80.1                                     | 125.8                                    |
| 234.4                                    | 130.5                                    | 138.1                                    | 148.7                                    | 78.2                                    | 79.9                                     | 126.3                                    |
| 692.7                                    | 130.5                                    | 138.4                                    | 148                                      | 73.9                                    | 79.6                                     | 126.9                                    |
| 630.3                                    | 130.6                                    | 138.8                                    | 147.3                                    | 127.6                                   | 79.3                                     | 127.5                                    |
| 508.5                                    | 130.6                                    | 139.2                                    | 146.6                                    | 114.7                                   | 79                                       | 123.4                                    |
| 368.9                                    | 130.7                                    | 139.6                                    | 146                                      | 103.3                                   | 78.7                                     | 123.9                                    |
| 274.5                                    | 130.8                                    | 140                                      | 152                                      | 93.2                                    | 78.3                                     | 124.4                                    |
| 233.6                                    | 130.9                                    | 137.1                                    | 151.2                                    | 84.4                                    | 80.1                                     | 124.9                                    |
| 222.5                                    | 130.5                                    | 137.3                                    | 150.4                                    | 78.1                                    | 79.9                                     | 125.4                                    |
| 217.1                                    | 130.5                                    | 137.6                                    | 149.6                                    | 73.8                                    | 79.7                                     | 125.9                                    |
| 217.7                                    | 130.5                                    | 137.9                                    | 148.9                                    | 70.1                                    | 79.4                                     | 126.5                                    |
| 678.6                                    | 130.5                                    | 138.3                                    | 148.2                                    | 66.9                                    | 79.2                                     | 127                                      |
| 712.1                                    | 130.6                                    | 138.6                                    | 147.5                                    | 64.3                                    | 78.9                                     | 127.6                                    |
| 691.1                                    | 130.6                                    | 139                                      | 146.9                                    | 140.5                                   | 78.6                                     | 128.2                                    |
| 627.2                                    | 130.7                                    | 139.4                                    | 146.2                                    | 126.4                                   | 78.3                                     | 122.6                                    |
| 502.9                                    | 130.8                                    | 139.8                                    | 145.6                                    | 113.7                                   | 78                                       | 123                                      |
| 363.8                                    | 130.8                                    | 140.2                                    | 145                                      | 102.4                                   | 77.6                                     | 123.5                                    |
| 271.8                                    | 131                                      | 140.6                                    | 153                                      | 92.4                                    | 77.2                                     | 124                                      |
| 232.8                                    | 131.1                                    | 141.1                                    | 152.2                                    | 83.8                                    | 76.8                                     | 124.5                                    |
| 222                                      | 131.2                                    | 137                                      | 151.4                                    | 78                                      | 79.7                                     | 125                                      |
| 216.9                                    | 130.6                                    | 137.2                                    | 150.6                                    | 73.7                                    | 79.5                                     | 125.5                                    |
| 217.7                                    | 130.5                                    | 137.5                                    | 149.9                                    | 70                                      | 79.2                                     | 126                                      |
| 223.3                                    | 130.5                                    | 137.8                                    | 149.1                                    | 66.8                                    | 79                                       | 126.6                                    |
| 232.2                                    | 130.5                                    | 138.1                                    | 148.4                                    | 64.2                                    | 78.8                                     | 127.1                                    |
| 597.9                                    | 130.6                                    | 138.5                                    | 147.7                                    | 62                                      | 78.5                                     | 127.7                                    |
| 682.1                                    | 130.6                                    | 138.8                                    | 147.1                                    | 60.3                                    | 78.2                                     | 128.3                                    |
| 711                                      | 130.6                                    | 139.2                                    | 146.4                                    | 154.7                                   | 77.9                                     | 128.9                                    |
| 689                                      | 130.7                                    | 139.6                                    | 145.8                                    | 139.3                                   | 77.6                                     | 121.7                                    |
| 623.6                                    | 130.8                                    | 140                                      | 145.2                                    | 125.3                                   | 77.2                                     | 122.2                                    |
| 496.7                                    | 130.9                                    | 140.4                                    | 144.6                                    | 112.7                                   | 76.9                                     | 122.6                                    |
| 358.4                                    | 131                                      | 140.8                                    | 144.1                                    | 101.6                                   | 76.5                                     | 123.1                                    |
| 268.9                                    | 131.1                                    | 141.3                                    | 154.1                                    | 91.8                                    | 76.1                                     | 123.5                                    |
| 231.9                                    | 131.3                                    | 141.8                                    | 153.3                                    | 83.3                                    | 75.7                                     | 124                                      |
| 221.4                                    | 131.4                                    | 136.9                                    | 152.4                                    | 77.9                                    | 79                                       | 124.5                                    |

**Supplementary Table 11:** Simulated data of impedance values for a Hopf Link circuit with  $N=9$ . Impedance values in each column correspond to impedance of points  $k_y, k_z$  within a  $k$  radius of 0.03 from a particular centered point  $k_{y0}, k_{z0}$ , in which  $\sqrt{(k_y - k_{y0})^2 + (k_z - k_{z0})^2} < 0.03$ . This table shows only part of the full dataset, the full dataset is distributed over Tables 4-14.

| $Z(k_{y0}=0.07$<br>$k_{z0}=1.26)/\Omega$ | $Z(k_{y0}=0.08$<br>$k_{z0}=0.86)/\Omega$ | $Z(k_{y0}=0.27$<br>$k_{z0}=0.92)/\Omega$ | $Z(k_{y0}=0.28$<br>$k_{z0}=0.71)/\Omega$ | $Z(k_{y0}=0.9$<br>$k_{z0}=1.28)/\Omega$ | $Z(k_{y0}=1.24$<br>$k_{z0}=0.35)/\Omega$ | $Z(k_{y0}=0.71$<br>$k_{z0}=0.14)/\Omega$ |
|------------------------------------------|------------------------------------------|------------------------------------------|------------------------------------------|-----------------------------------------|------------------------------------------|------------------------------------------|
| 216.7                                    | 130.6                                    | 137.2                                    | 151.6                                    | 73.6                                    | 78.8                                     | 125                                      |
| 217.8                                    | 130.6                                    | 137.4                                    | 150.8                                    | 69.9                                    | 78.6                                     | 125.6                                    |
| 223.5                                    | 130.6                                    | 137.7                                    | 150.1                                    | 66.8                                    | 78.3                                     | 126.1                                    |
| 232.6                                    | 130.6                                    | 138                                      | 149.4                                    | 64.1                                    | 78.1                                     | 126.7                                    |
| 244                                      | 130.6                                    | 138.3                                    | 148.6                                    | 62                                      | 77.8                                     | 127.3                                    |
| 602.3                                    | 130.6                                    | 138.6                                    | 148                                      | 60.3                                    | 77.5                                     | 127.9                                    |
| 685.9                                    | 130.6                                    | 139                                      | 147.3                                    | 58.9                                    | 77.2                                     | 128.5                                    |
| 709.5                                    | 130.7                                    | 139.4                                    | 146.6                                    | 170.2                                   | 76.9                                     | 129.1                                    |
| 686.4                                    | 130.8                                    | 139.8                                    | 146                                      | 153.4                                   | 76.5                                     | 120.9                                    |
| 619.5                                    | 130.8                                    | 140.2                                    | 145.4                                    | 138.1                                   | 76.2                                     | 121.3                                    |
| 489.9                                    | 130.9                                    | 140.6                                    | 144.8                                    | 124.3                                   | 75.8                                     | 121.8                                    |
| 352.9                                    | 131                                      | 141                                      | 144.3                                    | 111.9                                   | 75.4                                     | 122.2                                    |
| 265.8                                    | 131.2                                    | 141.5                                    | 154.3                                    | 100.8                                   | 74.9                                     | 122.7                                    |
| 230.9                                    | 131.3                                    | 142                                      | 153.5                                    | 91.2                                    | 74.5                                     | 123.1                                    |
| 220.9                                    | 131.5                                    | 136.9                                    | 152.7                                    | 82.9                                    | 78.6                                     | 123.6                                    |
| 216.5                                    | 130.7                                    | 137.1                                    | 151.9                                    | 77.9                                    | 78.4                                     | 124.1                                    |
| 217.8                                    | 130.7                                    | 137.4                                    | 151.1                                    | 73.6                                    | 78.1                                     | 124.6                                    |
| 223.8                                    | 130.7                                    | 137.6                                    | 150.3                                    | 69.8                                    | 77.9                                     | 125.1                                    |
| 233                                      | 130.6                                    | 137.9                                    | 149.6                                    | 66.7                                    | 77.7                                     | 125.7                                    |
| 244.5                                    | 130.6                                    | 138.2                                    | 148.9                                    | 64                                      | 77.4                                     | 126.2                                    |
| 257.9                                    | 130.6                                    | 138.5                                    | 148.2                                    | 61.9                                    | 77.1                                     | 126.8                                    |
| 526.3                                    | 130.6                                    | 138.8                                    | 147.5                                    | 60.2                                    | 76.8                                     | 127.4                                    |
| 607.1                                    | 130.7                                    | 139.2                                    | 146.9                                    | 58.9                                    | 76.5                                     | 128                                      |
| 689.7                                    | 130.7                                    | 139.6                                    | 146.2                                    | 168.8                                   | 76.2                                     | 128.6                                    |
| 707.4                                    | 130.8                                    | 140                                      | 145.6                                    | 152.1                                   | 75.8                                     | 120.5                                    |
| 683.3                                    | 130.9                                    | 140.4                                    | 145.1                                    | 137                                     | 75.5                                     | 120.9                                    |
| 614.8                                    | 131                                      | 140.8                                    | 144.5                                    | 123.4                                   | 75.1                                     | 121.3                                    |
| 482.6                                    | 131.1                                    | 141.2                                    | 143.9                                    | 111.1                                   | 74.6                                     | 121.8                                    |
| 347.3                                    | 131.2                                    | 141.7                                    | 155.5                                    | 100.2                                   | 74.2                                     | 122.2                                    |
| 262.5                                    | 131.4                                    | 142.2                                    | 154.6                                    | 90.6                                    | 73.7                                     | 122.7                                    |
| 230                                      | 131.5                                    | 142.7                                    | 153.7                                    | 82.9                                    | 77.9                                     | 123.2                                    |
| 220.3                                    | 131.7                                    | 137.1                                    | 152.9                                    | 77.9                                    | 77.7                                     | 123.7                                    |
| 216.3                                    | 130.8                                    | 137.3                                    | 152.1                                    | 73.5                                    | 77.5                                     | 124.2                                    |
| 217.9                                    | 130.7                                    | 137.6                                    | 151.3                                    | 69.8                                    | 77.3                                     | 124.7                                    |
| 224.1                                    | 130.7                                    | 137.8                                    | 150.6                                    | 66.6                                    | 77                                       | 125.2                                    |
| 233.4                                    | 130.7                                    | 138.1                                    | 149.8                                    | 64                                      | 76.7                                     | 125.8                                    |
| 245.1                                    | 130.7                                    | 138.4                                    | 149.1                                    | 61.8                                    | 76.5                                     | 126.4                                    |

**Supplementary Table 12:** Simulated data of impedance values for a Hopf Link circuit with N=9. Impedance values in each column correspond to impedance of points  $k_y, k_z$  within a k radius of 0.03 from a particular centered point  $k_{y0}, k_{z0}$ , in which  $\sqrt{(k_y - k_{y0})^2 + (k_z - k_{z0})^2} < 0.03$ . This table shows only part of the full dataset, the full dataset is distributed over Tables 4-14.

| $Z(k_{y0}=0.07$<br>$k_{z0}=1.26)/\Omega$ | $Z(k_{y0}=0.08$<br>$k_{z0}=0.86)/\Omega$ | $Z(k_{y0}=0.27$<br>$k_{z0}=0.92)/\Omega$ | $Z(k_{y0}=0.28$<br>$k_{z0}=0.71)/\Omega$ | $Z(k_{y0}=0.9$<br>$k_{z0}=1.28)/\Omega$ | $Z(k_{y0}=1.24$<br>$k_{z0}=0.35)/\Omega$ | $Z(k_{y0}=0.71$<br>$k_{z0}=0.14)/\Omega$ |
|------------------------------------------|------------------------------------------|------------------------------------------|------------------------------------------|-----------------------------------------|------------------------------------------|------------------------------------------|
| 258.6                                    | 130.7                                    | 138.7                                    | 148.4                                    | 60.1                                    | 76.2                                     | 127                                      |
| 530.5                                    | 130.7                                    | 139                                      | 147.8                                    | 58.8                                    | 75.8                                     | 127.6                                    |
| 612.3                                    | 130.7                                    | 139.4                                    | 147.1                                    | 57.8                                    | 75.5                                     | 128.2                                    |
| 693.7                                    | 130.8                                    | 139.8                                    | 146.5                                    | 167.5                                   | 75.1                                     | 128.8                                    |
| 704.7                                    | 130.9                                    | 140.2                                    | 145.9                                    | 151                                     | 74.7                                     | 120.1                                    |
| 679.6                                    | 130.9                                    | 140.6                                    | 145.3                                    | 136                                     | 74.3                                     | 120.5                                    |
| 609.4                                    | 131                                      | 141                                      | 144.7                                    | 122.5                                   | 73.9                                     | 120.9                                    |
| 474.7                                    | 131.1                                    | 141.4                                    | 144.2                                    | 110.4                                   | 73.5                                     | 121.4                                    |
| 341.3                                    | 131.3                                    | 141.9                                    | 155.7                                    | 99.6                                    | 73                                       | 121.8                                    |
| 259.1                                    | 131.4                                    | 142.4                                    | 154.9                                    | 90.1                                    | 72.5                                     | 122.3                                    |
| 228.9                                    | 131.6                                    | 142.9                                    | 154                                      | 82.9                                    | 77.3                                     | 122.8                                    |
| 219.7                                    | 131.7                                    | 137.3                                    | 153.2                                    | 77.9                                    | 77.1                                     | 123.2                                    |
| 216.1                                    | 130.8                                    | 137.5                                    | 152.4                                    | 73.5                                    | 76.8                                     | 123.8                                    |
| 218                                      | 130.8                                    | 137.8                                    | 151.6                                    | 69.8                                    | 76.6                                     | 124.3                                    |
| 224.4                                    | 130.8                                    | 138                                      | 150.8                                    | 66.6                                    | 76.3                                     | 124.8                                    |
| 233.9                                    | 130.7                                    | 138.3                                    | 150.1                                    | 64                                      | 76.1                                     | 125.4                                    |
| 245.7                                    | 130.7                                    | 138.6                                    | 149.4                                    | 61.8                                    | 75.8                                     | 125.9                                    |
| 259.3                                    | 130.7                                    | 138.9                                    | 148.7                                    | 60                                      | 75.5                                     | 126.5                                    |
| 535.1                                    | 130.8                                    | 139.2                                    | 148                                      | 58.7                                    | 75.1                                     | 127.1                                    |
| 617.8                                    | 130.8                                    | 139.6                                    | 147.3                                    | 57.7                                    | 74.8                                     | 127.7                                    |
| 697.7                                    | 130.8                                    | 140                                      | 146.7                                    | 166.3                                   | 74.4                                     | 128.3                                    |
| 701.2                                    | 130.9                                    | 140.4                                    | 146.1                                    | 150                                     | 74                                       | 119.7                                    |
| 675.1                                    | 131                                      | 140.8                                    | 145.5                                    | 135.2                                   | 73.6                                     | 120.1                                    |
| 603.3                                    | 131.1                                    | 141.2                                    | 144.9                                    | 121.8                                   | 73.2                                     | 120.5                                    |
| 466.2                                    | 131.2                                    | 141.7                                    | 144.4                                    | 109.7                                   | 72.7                                     | 121                                      |
| 334.9                                    | 131.3                                    | 142.1                                    | 156                                      | 99                                      | 72.3                                     | 121.4                                    |
| 255.5                                    | 131.5                                    | 142.6                                    | 155.1                                    | 89.7                                    | 71.8                                     | 121.9                                    |
| 227.9                                    | 131.6                                    | 143.1                                    | 154.3                                    | 82.9                                    | 76.6                                     | 122.3                                    |
| 219.1                                    | 131.8                                    | 137.5                                    | 153.4                                    | 77.9                                    | 76.4                                     | 122.8                                    |
| 215.9                                    | 130.9                                    | 137.7                                    | 152.6                                    | 73.6                                    | 76.2                                     | 123.3                                    |
| 218.2                                    | 130.9                                    | 138                                      | 151.8                                    | 69.8                                    | 76                                       | 123.8                                    |
| 224.8                                    | 130.8                                    | 138.2                                    | 151.1                                    | 66.6                                    | 75.7                                     | 124.4                                    |
| 234.5                                    | 130.8                                    | 138.5                                    | 150.3                                    | 63.9                                    | 75.4                                     | 124.9                                    |
| 246.4                                    | 130.8                                    | 138.8                                    | 149.6                                    | 61.7                                    | 75.1                                     | 125.5                                    |
| 260                                      | 130.8                                    | 139.1                                    | 148.9                                    | 60                                      | 74.8                                     | 126                                      |
| 540.1                                    | 130.8                                    | 139.5                                    | 148.2                                    | 58.7                                    | 74.5                                     | 126.6                                    |
| 623.8                                    | 130.8                                    | 139.8                                    | 147.6                                    | 57.7                                    | 74.1                                     | 127.2                                    |

**Supplementary Table 13:** Simulated data of impedance values for a Hopf Link circuit with  $N=9$ . Impedance values in each column correspond to impedance of points  $k_y, k_z$  within a  $k$  radius of 0.03 from a particular centered point  $k_{y0}, k_{z0}$ , in which  $\sqrt{(k_y - k_{y0})^2 + (k_z - k_{z0})^2} < 0.03$ . This table shows only part of the full dataset, the full dataset is distributed over Tables 4-14.

| $Z(k_{y0}=0.07$<br>$k_{z0}=1.26)/\Omega$ | $Z(k_{y0}=0.08$<br>$k_{z0}=0.86)/\Omega$ | $Z(k_{y0}=0.27$<br>$k_{z0}=0.92)/\Omega$ | $Z(k_{y0}=0.28$<br>$k_{z0}=0.71)/\Omega$ | $Z(k_{y0}=0.9$<br>$k_{z0}=1.28)/\Omega$ | $Z(k_{y0}=1.24$<br>$k_{z0}=0.35)/\Omega$ | $Z(k_{y0}=0.71$<br>$k_{z0}=0.14)/\Omega$ |
|------------------------------------------|------------------------------------------|------------------------------------------|------------------------------------------|-----------------------------------------|------------------------------------------|------------------------------------------|
| 701.6                                    | 130.9                                    | 140.2                                    | 146.9                                    | 165.2                                   | 73.7                                     | 127.9                                    |
| 699.4                                    | 131                                      | 140.6                                    | 146.3                                    | 149                                     | 73.3                                     | 119.3                                    |
| 669.8                                    | 131.1                                    | 141                                      | 145.7                                    | 134.4                                   | 72.9                                     | 119.7                                    |
| 596.5                                    | 131.1                                    | 141.4                                    | 145.2                                    | 121.1                                   | 72.5                                     | 120.1                                    |
| 457.2                                    | 131.3                                    | 141.9                                    | 144.6                                    | 109.1                                   | 72                                       | 120.6                                    |
| 328.1                                    | 131.4                                    | 142.4                                    | 155.4                                    | 98.6                                    | 71.5                                     | 121                                      |
| 251.9                                    | 131.5                                    | 142.8                                    | 154.5                                    | 89.3                                    | 71                                       | 121.4                                    |
| 226.8                                    | 131.7                                    | 143.4                                    | 153.7                                    | 83                                      | 76                                       | 121.9                                    |
| 218.5                                    | 131.9                                    | 137.9                                    | 152.9                                    | 78                                      | 75.8                                     | 122.4                                    |
| 215.7                                    | 130.9                                    | 138.2                                    | 152.1                                    | 73.6                                    | 75.6                                     | 122.9                                    |
| 218.3                                    | 130.9                                    | 138.4                                    | 151.3                                    | 69.8                                    | 75.3                                     | 123.4                                    |
| 225.2                                    | 130.9                                    | 138.7                                    | 150.6                                    | 66.6                                    | 75                                       | 123.9                                    |
| 235                                      | 130.8                                    | 139                                      | 149.9                                    | 63.9                                    | 74.7                                     | 124.5                                    |
| 247.1                                    | 130.9                                    | 139.3                                    | 149.2                                    | 61.7                                    | 74.4                                     | 125                                      |
| 260.8                                    | 130.9                                    | 139.7                                    | 148.5                                    | 60                                      | 74.1                                     | 125.6                                    |
| 630.1                                    | 130.9                                    | 140                                      | 147.8                                    | 58.6                                    | 73.8                                     | 126.2                                    |
| 705.3                                    | 131                                      | 140.4                                    | 147.2                                    | 57.6                                    | 73.4                                     | 126.8                                    |
| 701.6                                    | 131                                      | 140.8                                    | 146.6                                    | 164.2                                   | 73                                       | 127.4                                    |
| 666.7                                    | 131.1                                    | 141.2                                    | 146                                      | 148.2                                   | 72.6                                     | 119.3                                    |
| 588.9                                    | 131.2                                    | 141.6                                    | 145.4                                    | 133.6                                   | 72.2                                     | 119.7                                    |
| 447.6                                    | 131.3                                    | 142.1                                    | 144.8                                    | 120.5                                   | 71.8                                     | 120.1                                    |
| 321                                      | 131.4                                    | 142.6                                    | 155.7                                    | 108.6                                   | 71.3                                     | 120.6                                    |
| 248.1                                    | 131.6                                    | 143.1                                    | 154.8                                    | 98.1                                    | 70.8                                     | 121                                      |
| 225.7                                    | 131.7                                    | 143.6                                    | 154                                      | 89                                      | 75.2                                     | 121.5                                    |
| 217.9                                    | 131.9                                    | 138.1                                    | 153.1                                    | 83.1                                    | 74.9                                     | 122                                      |
| 215.5                                    | 131                                      | 138.4                                    | 152.3                                    | 78.1                                    | 74.7                                     | 122.5                                    |
| 218.5                                    | 130.9                                    | 138.6                                    | 151.6                                    | 73.7                                    | 74.4                                     | 123                                      |
| 225.6                                    | 130.9                                    | 138.9                                    | 150.8                                    | 69.9                                    | 74.1                                     | 123.5                                    |
| 235.7                                    | 130.9                                    | 139.2                                    | 150.1                                    | 66.6                                    | 73.8                                     | 124                                      |
| 247.8                                    | 130.9                                    | 139.5                                    | 149.4                                    | 63.9                                    | 73.4                                     | 124.6                                    |
| 261.7                                    | 130.9                                    | 139.9                                    | 148.7                                    | 61.7                                    | 73.1                                     | 125.1                                    |
| 636.8                                    | 131                                      | 140.2                                    | 148.1                                    | 59.9                                    | 72.7                                     | 125.7                                    |
| 708.8                                    | 131                                      | 140.6                                    | 147.4                                    | 58.5                                    | 72.3                                     | 126.3                                    |
| 703.4                                    | 131.1                                    | 141                                      | 146.8                                    | 147.5                                   | 71.9                                     | 118.9                                    |
| 665.7                                    | 131.2                                    | 141.4                                    | 146.2                                    | 133                                     | 71.5                                     | 119.3                                    |
| 580.4                                    | 131.3                                    | 141.9                                    | 145.6                                    | 119.9                                   | 71.1                                     | 119.7                                    |
| 437.6                                    | 131.4                                    | 142.3                                    | 145.1                                    | 108.2                                   | 70.6                                     | 120.2                                    |

**Supplementary Table 14:** Simulated data of impedance values for a Hopf Link circuit with  $N=9$ . Impedance values in each column correspond to impedance of points  $k_y, k_z$  within a  $k$  radius of 0.03 from a particular centered point  $k_{y0}, k_{z0}$ , in which  $\sqrt{(k_y - k_{y0})^2 + (k_z - k_{z0})^2} < 0.03$ . This table shows only part of the full dataset, the full dataset is distributed over Tables 4-14.

| $Z(k_{y0}=0.07$<br>$k_{z0}=1.26)/\Omega$ | $Z(k_{y0}=0.08$<br>$k_{z0}=0.86)/\Omega$ | $Z(k_{y0}=0.27$<br>$k_{z0}=0.92)/\Omega$ | $Z(k_{y0}=0.28$<br>$k_{z0}=0.71)/\Omega$ | $Z(k_{y0}=0.9$<br>$k_{z0}=1.28)/\Omega$ | $Z(k_{y0}=1.24$<br>$k_{z0}=0.35)/\Omega$ | $Z(k_{y0}=0.71$<br>$k_{z0}=0.14)/\Omega$ |
|------------------------------------------|------------------------------------------|------------------------------------------|------------------------------------------|-----------------------------------------|------------------------------------------|------------------------------------------|
| 313.6                                    | 131.5                                    | 142.8                                    | 155.1                                    | 97.8                                    | 70.1                                     | 120.6                                    |
| 244.3                                    | 131.7                                    | 143.3                                    | 154.2                                    | 89                                      | 74.3                                     | 121.1                                    |
| 224.6                                    | 131.8                                    | 138.6                                    | 153.4                                    | 83.2                                    | 74                                       | 121.5                                    |
| 217.3                                    | 131                                      | 138.9                                    | 152.6                                    | 78.2                                    | 73.7                                     | 122                                      |
| 215.4                                    | 131                                      | 139.1                                    | 151.8                                    | 73.7                                    | 73.4                                     | 122.5                                    |
| 218.8                                    | 131                                      | 139.4                                    | 151.1                                    | 69.9                                    | 73.1                                     | 123                                      |
| 226.1                                    | 131                                      | 139.8                                    | 150.4                                    | 66.7                                    | 72.8                                     | 123.6                                    |
| 236.3                                    | 131                                      | 140.1                                    | 149.7                                    | 63.9                                    | 72.4                                     | 124.1                                    |
| 248.6                                    | 131                                      | 140.5                                    | 149                                      | 61.7                                    | 72                                       | 124.7                                    |
| 711.9                                    | 131.1                                    | 140.8                                    | 148.3                                    | 59.9                                    | 71.6                                     | 125.3                                    |
| 704.6                                    | 131.2                                    | 141.2                                    | 147.7                                    | 58.5                                    | 71.2                                     | 125.8                                    |
| 663.9                                    | 131.2                                    | 141.7                                    | 147.1                                    | 132.5                                   | 70.8                                     | 118.9                                    |
| 571.2                                    | 131.3                                    | 142.1                                    | 146.5                                    | 119.5                                   | 70.3                                     | 119.3                                    |
| 427.1                                    | 131.5                                    | 142.6                                    | 145.9                                    | 107.8                                   | 69.9                                     | 119.8                                    |
| 305.8                                    | 131.6                                    | 143                                      | 154.5                                    | 97.5                                    | 73.4                                     | 120.2                                    |
| 240.5                                    | 131.7                                    | 139.1                                    | 153.7                                    | 89.2                                    | 73.1                                     | 120.6                                    |
| 223.5                                    | 131.1                                    | 139.4                                    | 152.9                                    | 83.4                                    | 72.8                                     | 121.1                                    |
| 216.7                                    | 131                                      | 139.7                                    | 152.1                                    | 78.3                                    | 72.4                                     | 121.6                                    |
| 215.3                                    | 131.1                                    | 140                                      | 151.4                                    | 73.9                                    | 72.1                                     | 122.1                                    |
| 219                                      | 131.1                                    | 140.3                                    | 150.6                                    | 70                                      | 71.7                                     | 122.6                                    |
| 226.6                                    | 131.1                                    | 140.7                                    | 149.9                                    | 66.7                                    | 71.4                                     | 123.1                                    |
| 237                                      | 131.2                                    | 141.1                                    | 149.2                                    | 64                                      | 71                                       | 123.7                                    |
| 661.2                                    | 131.2                                    | 141.5                                    | 148.6                                    | 61.7                                    | 70.5                                     | 124.2                                    |
| 561                                      | 131.3                                    | 141.9                                    | 147.9                                    | 59.9                                    | 70.1                                     | 124.8                                    |
| 416.7                                    | 131.4                                    | 142.3                                    | 147.3                                    | 119.1                                   | 69.6                                     | 119.3                                    |
| 297.9                                    | 131.5                                    | 142.8                                    | 146.7                                    | 107.5                                   | 72.1                                     | 119.8                                    |
| 236.6                                    | 131.7                                    | 139.9                                    | 153.2                                    | 97.3                                    | 71.8                                     | 120.2                                    |
| 222.3                                    | 131.1                                    | 140.2                                    | 152.4                                    | 89.4                                    | 71.4                                     | 120.7                                    |
| 216.1                                    | 131.2                                    | 140.6                                    | 151.6                                    | 83.6                                    | 71.1                                     | 121.2                                    |
| 215.2                                    | 131.2                                    | 140.9                                    | 150.9                                    | 78.5                                    | 70.7                                     | 121.7                                    |
| 219.3                                    | 131.3                                    | 141.3                                    | 150.2                                    | 74                                      | 70.3                                     | 122.2                                    |
| 289.7                                    | 131.4                                    | 141.7                                    | 149.5                                    | 70.1                                    | 69.9                                     | 122.7                                    |
| 232.7                                    | N/A                                      | 142.1                                    | 148.8                                    | 66.8                                    | N/A                                      | 123.2                                    |
| 221.2                                    | N/A                                      | N/A                                      | 148.2                                    | 64                                      | N/A                                      | 120.3                                    |
| 215.5                                    | N/A                                      | N/A                                      | N/A                                      | 89.7                                    | N/A                                      | 120.7                                    |
| N/A                                      | N/A                                      | N/A                                      | N/A                                      | 83.8                                    | N/A                                      | N/A                                      |
| N/A                                      | N/A                                      | N/A                                      | N/A                                      | 78.7                                    | N/A                                      | N/A                                      |
| N/A                                      | N/A                                      | N/A                                      | N/A                                      | 74.2                                    | N/A                                      | N/A                                      |

- 
- [1] Y. Lu, N. Jia, L. Su, C. Owens, G. Juzeliūnas, D. I. Schuster, and J. Simon, Probing the berry curvature and fermi arcs of a weyl circuit, *Phys. Rev. B* **99**, 020302 (2019).
  - [2] J. Bao, D. Zou, W. Zhang, W. He, H. Sun, and X. Zhang, Topoelectrical circuit octupole insulator with topologically protected corner states, *Physical Review B* **100**, 201406 (2019).
  - [3] W. Zhang, D. Zou, W. He, J. Bao, Q. Pei, H. Sun, and X. Zhang, Topoelectrical-circuit realization of 4d hexadecapole insulator, arXiv preprint arXiv:2001.07931 (2020).
